# Supplementary material for: Quantitative proteomic analysis of aqueous humor after rabbit lensectomy reveals differences in coagulation and immunomodulatory proteins
Source: Royal Society of Chemistry journal article supplement (doi:10.1039/c9mo00169g), 2020-01-21
Supplement: c9mo00169g1.xlsx [file c9mo00169g1.xlsx]

## Sheet: Sheet1
Raw File	DDA/DIA/PRM	Technical Replicate	Rabbit ID	Surgical Intervention	Days Post Surgery
1005_Porter_171222_Ps011_31818_POD3_DIA1	DIA	1	31818	Lensectomy with IOL	POD3
1005_Porter_171222_Ps011_31818_POD3_DIA2	DIA	2	31818	Lensectomy with IOL	POD3
1005_Porter_171222_Ps011_31818_POD3_DIA3	DIA	3	31818	Lensectomy with IOL	POD3
1005_Porter_171222_Ps011_31818_Pre_DIA1	DIA	1	31818	Lensectomy with IOL	Pre
1005_Porter_171222_Ps011_31818_Pre_DIA2	DIA	2	31818	Lensectomy with IOL	Pre
1005_Porter_171222_Ps011_31818_Pre_DIA3	DIA	3	31818	Lensectomy with IOL	Pre
1005_Porter_171222_Ps011_31819_POD3_DIA1	DIA	1	31819	Lensectomy with IOL	POD3
1005_Porter_171222_Ps011_31819_POD3_DIA2	DIA	2	31819	Lensectomy with IOL	POD3
1005_Porter_171222_Ps011_31819_POD3_DIA3	DIA	3	31819	Lensectomy with IOL	POD3
1005_Porter_171222_Ps011_31819_Pre_DIA1	DIA	1	31819	Lensectomy with IOL	Pre
1005_Porter_171222_Ps011_31819_Pre_DIA2	DIA	2	31819	Lensectomy with IOL	Pre
1005_Porter_171222_Ps011_31819_Pre_DIA3	DIA	3	31819	Lensectomy with IOL	Pre
1005_Porter_171222_Ps011_31822_POD3_DIA1	DIA	1	31822	Lensectomy with IOL	POD3
1005_Porter_171222_Ps011_31822_POD3_DIA2	DIA	2	31822	Lensectomy with IOL	POD3
1005_Porter_171222_Ps011_31822_POD3_DIA3	DIA	3	31822	Lensectomy with IOL	POD3
1005_Porter_171222_Ps011_31822_Pre_DIA1	DIA	1	31822	Lensectomy with IOL	Pre
1005_Porter_171222_Ps011_31822_Pre_DIA2	DIA	2	31822	Lensectomy with IOL	Pre
1005_Porter_171222_Ps011_31822_Pre_DIA3	DIA	3	31822	Lensectomy with IOL	Pre
1005_Porter_171222_Ps011_31864_POD3_DIA1	DIA	1	31864	Lensectomy with IOL	POD3
1005_Porter_171222_Ps011_31864_POD3_DIA2	DIA	2	31864	Lensectomy with IOL	POD3
1005_Porter_171222_Ps011_31864_POD3_DIA3	DIA	3	31864	Lensectomy with IOL	POD3
1005_Porter_171222_Ps011_31864_Pre_DIA1	DIA	1	31864	Lensectomy with IOL	Pre
1005_Porter_171222_Ps011_31864_Pre_DIA2	DIA	2	31864	Lensectomy with IOL	Pre
1005_Porter_171222_Ps011_31864_Pre_DIA3	DIA	3	31864	Lensectomy with IOL	Pre
1005_Porter_171222_Ps011_31865_POD3_DIA1	DIA	1	31865	Lensectomy with IOL	POD3
1005_Porter_171222_Ps011_31865_POD3_DIA2	DIA	2	31865	Lensectomy with IOL	POD3
1005_Porter_171222_Ps011_31865_POD3_DIA3	DIA	3	31865	Lensectomy with IOL	POD3
1005_Porter_171222_Ps011_31865_Pre_DIA1	DIA	1	31865	Lensectomy with IOL	Pre
1005_Porter_171222_Ps011_31865_Pre_DIA2	DIA	2	31865	Lensectomy with IOL	Pre
1005_Porter_171222_Ps011_31865_Pre_DIA3	DIA	3	31865	Lensectomy with IOL	Pre
1005_Porter_171222_Ps011_31872_POD3_DIA1	DIA	1	31872	Lensectomy	POD3
1005_Porter_171222_Ps011_31872_POD3_DIA2	DIA	2	31872	Lensectomy	POD3
1005_Porter_171222_Ps011_31872_POD3_DIA3	DIA	3	31872	Lensectomy	POD3
1005_Porter_171222_Ps011_31872_Pre_DIA1	DIA	1	31872	Lensectomy	Pre
1005_Porter_171222_Ps011_31872_Pre_DIA2	DIA	2	31872	Lensectomy	Pre
1005_Porter_171222_Ps011_31872_Pre_DIA3	DIA	3	31872	Lensectomy	Pre
1005_Porter_171222_Ps011_31873_POD3_DIA1	DIA	1	31873	Lensectomy	POD3
1005_Porter_171222_Ps011_31873_POD3_DIA2	DIA	2	31873	Lensectomy	POD3
1005_Porter_171222_Ps011_31873_POD3_DIA3	DIA	3	31873	Lensectomy	POD3
1005_Porter_171222_Ps011_31873_Pre_DIA1	DIA	1	31873	Lensectomy	Pre
1005_Porter_171222_Ps011_31873_Pre_DIA2	DIA	2	31873	Lensectomy	Pre
1005_Porter_171222_Ps011_31873_Pre_DIA3	DIA	3	31873	Lensectomy	Pre
1005_Porter_171222_Ps011_31874_POD3_DIA1	DIA	1	31874	Lensectomy	POD3
1005_Porter_171222_Ps011_31874_POD3_DIA2	DIA	2	31874	Lensectomy	POD3
1005_Porter_171222_Ps011_31874_POD3_DIA3	DIA	3	31874	Lensectomy	POD3
1005_Porter_171222_Ps011_31874_Pre_DIA1	DIA	1	31874	Lensectomy	Pre
1005_Porter_171222_Ps011_31874_Pre_DIA2	DIA	2	31874	Lensectomy	Pre
1005_Porter_171222_Ps011_31874_Pre_DIA3	DIA	3	31874	Lensectomy	Pre
1005_Porter_171222_Ps011_31875_POD3_DIA1	DIA	1	31875	Paracentesis	POD3
1005_Porter_171222_Ps011_31875_POD3_DIA2	DIA	2	31875	Paracentesis	POD3
1005_Porter_171222_Ps011_31875_POD3_DIA3	DIA	3	31875	Paracentesis	POD3
1005_Porter_171222_Ps011_31875_Pre_DIA1	DIA	1	31875	Paracentesis	Pre
1005_Porter_171222_Ps011_31875_Pre_DIA2	DIA	2	31875	Paracentesis	Pre
1005_Porter_171222_Ps011_31875_Pre_DIA3	DIA	3	31875	Paracentesis	Pre
1005_Porter_171222_Ps011_31876_POD3_DIA1	DIA	1	31876	Paracentesis	POD3
1005_Porter_171222_Ps011_31876_POD3_DIA2	DIA	2	31876	Paracentesis	POD3
1005_Porter_171222_Ps011_31876_POD3_DIA3	DIA	3	31876	Paracentesis	POD3
1005_Porter_171222_Ps011_31876_Pre_DIA1	DIA	1	31876	Paracentesis	Pre
1005_Porter_171222_Ps011_31876_Pre_DIA2	DIA	2	31876	Paracentesis	Pre
1005_Porter_171222_Ps011_31876_Pre_DIA3	DIA	3	31876	Paracentesis	Pre
1005_Porter_171222_Ps011_31877_POD3_DIA1	DIA	1	31877	Paracentesis	POD3
1005_Porter_171222_Ps011_31877_POD3_DIA2	DIA	2	31877	Paracentesis	POD3
1005_Porter_171222_Ps011_31877_POD3_DIA3	DIA	3	31877	Paracentesis	POD3
1005_Porter_171222_Ps011_31877_Pre_DIA1	DIA	1	31877	Paracentesis	Pre
1005_Porter_171222_Ps011_31877_Pre_DIA2	DIA	2	31877	Paracentesis	Pre
1005_Porter_171222_Ps011_31877_Pre_DIA3	DIA	3	31877	Paracentesis	Pre
1005_Porter_171222_Ps011_31878_POD3_DIA1	DIA	1	31878	Paracentesis	POD3
1005_Porter_171222_Ps011_31878_POD3_DIA2	DIA	2	31878	Paracentesis	POD3
1005_Porter_171222_Ps011_31878_POD3_DIA3	DIA	3	31878	Paracentesis	POD3
1005_Porter_171222_Ps011_31878_Pre_DIA1	DIA	1	31878	Paracentesis	Pre
1005_Porter_171222_Ps011_31878_Pre_DIA2	DIA	2	31878	Paracentesis	Pre
1005_Porter_171222_Ps011_31878_Pre_DIA3	DIA	3	31878	Paracentesis	Pre
1005_Porter_171222_Ps011_31880_POD3_DIA1	DIA	1	31880	Paracentesis	POD3
1005_Porter_171222_Ps011_31880_POD3_DIA2	DIA	2	31880	Paracentesis	POD3
1005_Porter_171222_Ps011_31880_POD3_DIA3	DIA	3	31880	Paracentesis	POD3
1005_Porter_171222_Ps011_31880_Pre_DIA1	DIA	1	31880	Paracentesis	Pre
1005_Porter_171222_Ps011_31880_Pre_DIA2	DIA	2	31880	Paracentesis	Pre
1005_Porter_171222_Ps011_31880_Pre_DIA3	DIA	3	31880	Paracentesis	Pre
1005_Porter_171222_Ps011_31881_POD3_DIA1	DIA	1	31881	Paracentesis	POD3
1005_Porter_171222_Ps011_31881_POD3_DIA2	DIA	2	31881	Paracentesis	POD3
1005_Porter_171222_Ps011_31881_POD3_DIA3	DIA	3	31881	Paracentesis	POD3
1005_Porter_171222_Ps011_31881_Pre_DIA1	DIA	1	31881	Paracentesis	Pre
1005_Porter_171222_Ps011_31881_Pre_DIA2	DIA	2	31881	Paracentesis	Pre
1005_Porter_171222_Ps011_31881_Pre_DIA3	DIA	3	31881	Paracentesis	Pre
1005_Porter_171222_Ps011_31882_POD3_DIA1	DIA	1	31882	Paracentesis	POD3
1005_Porter_171222_Ps011_31882_POD3_DIA2	DIA	2	31882	Paracentesis	POD3
1005_Porter_171222_Ps011_31882_POD3_DIA3	DIA	3	31882	Paracentesis	POD3
1005_Porter_171222_Ps011_31882_Pre_DIA1	DIA	1	31882	Paracentesis	Pre
1005_Porter_171222_Ps011_31882_Pre_DIA2	DIA	2	31882	Paracentesis	Pre
1005_Porter_171222_Ps011_31882_Pre_DIA3	DIA	3	31882	Paracentesis	Pre
1005_Porter_171222_Ps011_31883_POD3_DIA1	DIA	1	31883	Lensectomy	POD3
1005_Porter_171222_Ps011_31883_POD3_DIA2	DIA	2	31883	Lensectomy	POD3
1005_Porter_171222_Ps011_31883_POD3_DIA3	DIA	3	31883	Lensectomy	POD3
1005_Porter_171222_Ps011_31883_Pre_DIA1	DIA	1	31883	Lensectomy	Pre
1005_Porter_171222_Ps011_31883_Pre_DIA2	DIA	2	31883	Lensectomy	Pre
1005_Porter_171222_Ps011_31883_Pre_DIA3	DIA	3	31883	Lensectomy	Pre
1005_Porter_171222_Ps011_31884_POD3_DIA1	DIA	1	31884	Lensectomy	POD3
1005_Porter_171222_Ps011_31884_POD3_DIA2	DIA	2	31884	Lensectomy	POD3
1005_Porter_171222_Ps011_31884_POD3_DIA3	DIA	3	31884	Lensectomy	POD3
1005_Porter_171222_Ps011_31884_Pre_DIA1	DIA	1	31884	Lensectomy	Pre
1005_Porter_171222_Ps011_31884_Pre_DIA2	DIA	2	31884	Lensectomy	Pre
1005_Porter_171222_Ps011_31884_Pre_DIA3	DIA	3	31884	Lensectomy	Pre
1005_Porter_171222_Ps011_31885_POD3_DIA1	DIA	1	31885	Lensectomy	POD3
1005_Porter_171222_Ps011_31885_POD3_DIA2	DIA	2	31885	Lensectomy	POD3
1005_Porter_171222_Ps011_31885_POD3_DIA3	DIA	3	31885	Lensectomy	POD3
1005_Porter_171222_Ps011_31885_Pre_DIA1	DIA	1	31885	Lensectomy	Pre
1005_Porter_171222_Ps011_31885_Pre_DIA2	DIA	2	31885	Lensectomy	Pre
1005_Porter_171222_Ps011_31885_Pre_DIA3	DIA	3	31885	Lensectomy	Pre
1005_Porter_171222_Ps011_31887_POD3_DIA1	DIA	1	31887	Paracentesis	POD3
1005_Porter_171222_Ps011_31887_POD3_DIA2	DIA	2	31887	Paracentesis	POD3
1005_Porter_171222_Ps011_31887_POD3_DIA3	DIA	3	31887	Paracentesis	POD3
1005_Porter_171222_Ps011_31887_Pre_DIA1	DIA	1	31887	Paracentesis	Pre
1005_Porter_171222_Ps011_31887_Pre_DIA2	DIA	2	31887	Paracentesis	Pre
1005_Porter_171222_Ps011_31887_Pre_DIA3	DIA	3	31887	Paracentesis	Pre
1005_Porter_171222_Ps011_31888_POD3_DIA1	DIA	1	31888	Paracentesis	POD3
1005_Porter_171222_Ps011_31888_POD3_DIA2	DIA	2	31888	Paracentesis	POD3
1005_Porter_171222_Ps011_31888_POD3_DIA3	DIA	3	31888	Paracentesis	POD3
1005_Porter_171222_Ps011_31888_Pre_DIA1	DIA	1	31888	Paracentesis	Pre
1005_Porter_171222_Ps011_31888_Pre_DIA2	DIA	2	31888	Paracentesis	Pre
1005_Porter_171222_Ps011_31888_Pre_DIA3	DIA	3	31888	Paracentesis	Pre
1005_Porter_171222_Ps011_31893_POD3_DIA1	DIA	1	31893	Incision with suture	POD3
1005_Porter_171222_Ps011_31893_POD3_DIA2	DIA	2	31893	Incision with suture	POD3
1005_Porter_171222_Ps011_31893_POD3_DIA3	DIA	3	31893	Incision with suture	POD3
1005_Porter_171222_Ps011_31893_Pre_DIA1	DIA	1	31893	Incision with suture	Pre
1005_Porter_171222_Ps011_31893_Pre_DIA2	DIA	2	31893	Incision with suture	Pre
1005_Porter_171222_Ps011_31893_Pre_DIA3	DIA	3	31893	Incision with suture	Pre
1005_Porter_171222_Ps011_31894_POD3_DIA1	DIA	1	31894	Incision with suture	POD3
1005_Porter_171222_Ps011_31894_POD3_DIA2	DIA	2	31894	Incision with suture	POD3
1005_Porter_171222_Ps011_31894_POD3_DIA3	DIA	3	31894	Incision with suture	POD3
1005_Porter_171222_Ps011_31894_Pre_DIA1	DIA	1	31894	Incision with suture	Pre
1005_Porter_171222_Ps011_31894_Pre_DIA2	DIA	2	31894	Incision with suture	Pre
1005_Porter_171222_Ps011_31894_Pre_DIA3	DIA	3	31894	Incision with suture	Pre
1005_Porter_171222_Ps011_31895_POD3_DIA1	DIA	1	31895	Incision with suture	POD3
1005_Porter_171222_Ps011_31895_POD3_DIA2	DIA	2	31895	Incision with suture	POD3
1005_Porter_171222_Ps011_31895_POD3_DIA3	DIA	3	31895	Incision with suture	POD3
1005_Porter_171222_Ps011_31895_Pre_DIA1	DIA	1	31895	Incision with suture	Pre
1005_Porter_171222_Ps011_31895_Pre_DIA2	DIA	2	31895	Incision with suture	Pre
1005_Porter_171222_Ps011_31895_Pre_DIA3	DIA	3	31895	Incision with suture	Pre
1005_Porter_171222_Ps011_31896_POD3_DIA1	DIA	1	31896	Incision with suture	POD3
1005_Porter_171222_Ps011_31896_POD3_DIA2	DIA	2	31896	Incision with suture	POD3
1005_Porter_171222_Ps011_31896_POD3_DIA3	DIA	3	31896	Incision with suture	POD3
1005_Porter_171222_Ps011_31896_Pre_DIA1	DIA	1	31896	Incision with suture	Pre
1005_Porter_171222_Ps011_31896_Pre_DIA2	DIA	2	31896	Incision with suture	Pre
1005_Porter_171222_Ps011_31896_Pre_DIA3	DIA	3	31896	Incision with suture	Pre
1005_Porter_171222_Ps011_31897_POD3_DIA1	DIA	1	31897	Incision with suture	POD3
1005_Porter_171222_Ps011_31897_POD3_DIA2	DIA	2	31897	Incision with suture	POD3
1005_Porter_171222_Ps011_31897_POD3_DIA3	DIA	3	31897	Incision with suture	POD3
1005_Porter_171222_Ps011_31897_Pre_DIA1	DIA	1	31897	Incision with suture	Pre
1005_Porter_171222_Ps011_31897_Pre_DIA2	DIA	2	31897	Incision with suture	Pre
1005_Porter_171222_Ps011_31897_Pre_DIA3	DIA	3	31897	Incision with suture	Pre
1005_Porter_171222_Ps011_31898_POD3_DIA1	DIA	1	31898	Incision with suture	POD3
1005_Porter_171222_Ps011_31898_POD3_DIA2	DIA	2	31898	Incision with suture	POD3
1005_Porter_171222_Ps011_31898_POD3_DIA3	DIA	3	31898	Incision with suture	POD3
1005_Porter_171222_Ps011_31898_Pre_DIA1	DIA	1	31898	Incision with suture	Pre
1005_Porter_171222_Ps011_31898_Pre_DIA2	DIA	2	31898	Incision with suture	Pre
1005_Porter_171222_Ps011_31898_Pre_DIA3	DIA	3	31898	Incision with suture	Pre
1005_Porter_171222_Ps011_AphakiaPooledQC_01	DIA	1	PooledQC	Lensectomy	PooledQC
1005_Porter_171222_Ps011_AphakiaPooledQC_02	DIA	2	PooledQC	Lensectomy	PooledQC
1005_Porter_171222_Ps011_AphakiaPooledQC_03	DIA	3	PooledQC	Lensectomy	PooledQC
1005_Porter_171222_Ps011_AphakiaPooledQC_04	DIA	4	PooledQC	Lensectomy	PooledQC
1005_Porter_171222_Ps011_AphakiaPooledQC_05	DIA	5	PooledQC	Lensectomy	PooledQC
1005_Porter_171222_Ps011_AphakiaPooledQC_06	DIA	6	PooledQC	Lensectomy	PooledQC
1005_Porter_171222_Ps011_AphakiaPooledQC_07	DIA	7	PooledQC	Lensectomy	PooledQC
1005_Porter_171222_Ps011_IncisionWithSuturePooledQC_01_IC	DIA	1	PooledQC	Incision with suture	PooledQC
1005_Porter_171222_Ps011_IncisionWithSuturePooledQC_02	DIA	2	PooledQC	Incision with suture	PooledQC
1005_Porter_171222_Ps011_IncisionWithSuturePooledQC_03	DIA	3	PooledQC	Incision with suture	PooledQC
1005_Porter_171222_Ps011_IncisionWithSuturePooledQC_04	DIA	4	PooledQC	Incision with suture	PooledQC
1005_Porter_171222_Ps011_IncisionWithSuturePooledQC_05	DIA	5	PooledQC	Incision with suture	PooledQC
1005_Porter_171222_Ps011_IncisionWithSuturePooledQC_06	DIA	6	PooledQC	Incision with suture	PooledQC
1005_Porter_171222_Ps011_IncisionWithSuturePooledQC_07	DIA	7	PooledQC	Incision with suture	PooledQC
1005_Porter_171222_Ps011_LensectomyIOLPooledQC_01	DIA	1	PooledQC	Lensectomy with IOL	PooledQC
1005_Porter_171222_Ps011_LensectomyIOLPooledQC_02	DIA	2	PooledQC	Lensectomy with IOL	PooledQC
1005_Porter_171222_Ps011_LensectomyIOLPooledQC_03	DIA	3	PooledQC	Lensectomy with IOL	PooledQC
1005_Porter_171222_Ps011_LensectomyIOLPooledQC_04	DIA	4	PooledQC	Lensectomy with IOL	PooledQC
1005_Porter_171222_Ps011_LensectomyIOLPooledQC_05	DIA	5	PooledQC	Lensectomy with IOL	PooledQC
1005_Porter_171222_Ps011_LensectomyIOLPooledQC_06	DIA	6	PooledQC	Lensectomy with IOL	PooledQC
1005_Porter_171222_Ps011_LensectomyIOLPooledQC_07	DIA	7	PooledQC	Lensectomy with IOL	PooledQC
1005_Porter_171222_Ps011_ParacentesisPooledQC_01	DIA	1	PooledQC	Paracentesis	PooledQC
1005_Porter_171222_Ps011_ParacentesisPooledQC_02	DIA	2	PooledQC	Paracentesis	PooledQC
1005_Porter_171222_Ps011_ParacentesisPooledQC_03	DIA	3	PooledQC	Paracentesis	PooledQC
1005_Porter_171222_Ps011_ParacentesisPooledQC_04	DIA	4	PooledQC	Paracentesis	PooledQC
1005_Porter_171222_Ps011_ParacentesisPooledQC_05	DIA	5	PooledQC	Paracentesis	PooledQC
1005_Porter_171222_Ps011_ParacentesisPooledQC_06	DIA	6	PooledQC	Paracentesis	PooledQC
1005_Porter_171222_Ps011_ParacentesisPooledQC_07	DIA	7	PooledQC	Paracentesis	PooledQC
1005_Porter_171222_Ps011_31818_POD3_DDA1	DDA	1	31818	Lensectomy with IOL	POD3
1005_Porter_171222_Ps011_31818_POD3_DDA2	DDA	2	31818	Lensectomy with IOL	POD3
1005_Porter_171222_Ps011_31818_POD3_DDA3	DDA	3	31818	Lensectomy with IOL	POD3
1005_Porter_171222_Ps011_31818_Pre_DDA1	DDA	1	31818	Lensectomy with IOL	Pre
1005_Porter_171222_Ps011_31818_Pre_DDA2	DDA	2	31818	Lensectomy with IOL	Pre
1005_Porter_171222_Ps011_31818_Pre_DDA3	DDA	3	31818	Lensectomy with IOL	Pre
1005_Porter_171222_Ps011_31819_POD3_DDA1	DDA	1	31819	Lensectomy with IOL	POD3
1005_Porter_171222_Ps011_31819_POD3_DDA2	DDA	2	31819	Lensectomy with IOL	POD3
1005_Porter_171222_Ps011_31819_POD3_DDA3	DDA	3	31819	Lensectomy with IOL	POD3
1005_Porter_171222_Ps011_31819_Pre_DDA1	DDA	1	31819	Lensectomy with IOL	Pre
1005_Porter_171222_Ps011_31819_Pre_DDA2	DDA	2	31819	Lensectomy with IOL	Pre
1005_Porter_171222_Ps011_31819_Pre_DDA3	DDA	3	31819	Lensectomy with IOL	Pre
1005_Porter_171222_Ps011_31822_POD3_DDA1	DDA	1	31822	Lensectomy with IOL	POD3
1005_Porter_171222_Ps011_31822_POD3_DDA2	DDA	2	31822	Lensectomy with IOL	POD3
1005_Porter_171222_Ps011_31822_POD3_DDA3	DDA	3	31822	Lensectomy with IOL	POD3
1005_Porter_171222_Ps011_31822_Pre_DDA1	DDA	1	31822	Lensectomy with IOL	Pre
1005_Porter_171222_Ps011_31822_Pre_DDA2	DDA	2	31822	Lensectomy with IOL	Pre
1005_Porter_171222_Ps011_31822_Pre_DDA3	DDA	3	31822	Lensectomy with IOL	Pre
1005_Porter_171222_Ps011_31864_POD3_DDA1	DDA	1	31864	Lensectomy with IOL	POD3
1005_Porter_171222_Ps011_31864_POD3_DDA2	DDA	2	31864	Lensectomy with IOL	POD3
1005_Porter_171222_Ps011_31864_POD3_DDA3	DDA	3	31864	Lensectomy with IOL	POD3
1005_Porter_171222_Ps011_31864_Pre_DDA1	DDA	1	31864	Lensectomy with IOL	Pre
1005_Porter_171222_Ps011_31864_Pre_DDA2	DDA	2	31864	Lensectomy with IOL	Pre
1005_Porter_171222_Ps011_31864_Pre_DDA3	DDA	3	31864	Lensectomy with IOL	Pre
1005_Porter_171222_Ps011_31865_POD3_DDA1	DDA	1	31865	Lensectomy with IOL	POD3
1005_Porter_171222_Ps011_31865_POD3_DDA2	DDA	2	31865	Lensectomy with IOL	POD3
1005_Porter_171222_Ps011_31865_POD3_DDA3	DDA	3	31865	Lensectomy with IOL	POD3
1005_Porter_171222_Ps011_31865_Pre_DDA1	DDA	1	31865	Lensectomy with IOL	Pre
1005_Porter_171222_Ps011_31865_Pre_DDA2	DDA	2	31865	Lensectomy with IOL	Pre
1005_Porter_171222_Ps011_31865_Pre_DDA3	DDA	3	31865	Lensectomy with IOL	Pre
1005_Porter_171222_Ps011_31872_POD3_DDA1	DDA	1	31872	Lensectomy	POD3
1005_Porter_171222_Ps011_31872_POD3_DDA2	DDA	2	31872	Lensectomy	POD3
1005_Porter_171222_Ps011_31872_POD3_DDA3	DDA	3	31872	Lensectomy	POD3
1005_Porter_171222_Ps011_31872_Pre_DDA1	DDA	1	31872	Lensectomy	Pre
1005_Porter_171222_Ps011_31872_Pre_DDA2	DDA	2	31872	Lensectomy	Pre
1005_Porter_171222_Ps011_31872_Pre_DDA3	DDA	3	31872	Lensectomy	Pre
1005_Porter_171222_Ps011_31873_POD3_DDA1	DDA	1	31873	Lensectomy	POD3
1005_Porter_171222_Ps011_31873_POD3_DDA2	DDA	2	31873	Lensectomy	POD3
1005_Porter_171222_Ps011_31873_POD3_DDA3	DDA	3	31873	Lensectomy	POD3
1005_Porter_171222_Ps011_31873_Pre_DDA1	DDA	1	31873	Lensectomy	Pre
1005_Porter_171222_Ps011_31873_Pre_DDA2	DDA	2	31873	Lensectomy	Pre
1005_Porter_171222_Ps011_31873_Pre_DDA3	DDA	3	31873	Lensectomy	Pre
1005_Porter_171222_Ps011_31874_POD3_DDA1	DDA	1	31874	Lensectomy	POD3
1005_Porter_171222_Ps011_31874_POD3_DDA2	DDA	2	31874	Lensectomy	POD3
1005_Porter_171222_Ps011_31874_POD3_DDA3	DDA	3	31874	Lensectomy	POD3
1005_Porter_171222_Ps011_31874_Pre_DDA1	DDA	1	31874	Lensectomy	Pre
1005_Porter_171222_Ps011_31874_Pre_DDA2	DDA	2	31874	Lensectomy	Pre
1005_Porter_171222_Ps011_31874_Pre_DDA3	DDA	3	31874	Lensectomy	Pre
1005_Porter_171222_Ps011_31875_POD3_DDA1	DDA	1	31875	Paracentesis	POD3
1005_Porter_171222_Ps011_31875_POD3_DDA2	DDA	2	31875	Paracentesis	POD3
1005_Porter_171222_Ps011_31875_POD3_DDA3	DDA	3	31875	Paracentesis	POD3
1005_Porter_171222_Ps011_31875_Pre_DDA1	DDA	1	31875	Paracentesis	Pre
1005_Porter_171222_Ps011_31875_Pre_DDA2	DDA	2	31875	Paracentesis	Pre
1005_Porter_171222_Ps011_31875_Pre_DDA3	DDA	3	31875	Paracentesis	Pre
1005_Porter_171222_Ps011_31876_POD3_DDA1	DDA	1	31876	Paracentesis	POD3
1005_Porter_171222_Ps011_31876_POD3_DDA2	DDA	2	31876	Paracentesis	POD3
1005_Porter_171222_Ps011_31876_POD3_DDA3	DDA	3	31876	Paracentesis	POD3
1005_Porter_171222_Ps011_31876_Pre_DDA1	DDA	1	31876	Paracentesis	Pre
1005_Porter_171222_Ps011_31876_Pre_DDA2	DDA	2	31876	Paracentesis	Pre
1005_Porter_171222_Ps011_31876_Pre_DDA3	DDA	3	31876	Paracentesis	Pre
1005_Porter_171222_Ps011_31877_POD3_DDA1	DDA	1	31877	Paracentesis	POD3
1005_Porter_171222_Ps011_31877_POD3_DDA2	DDA	2	31877	Paracentesis	POD3
1005_Porter_171222_Ps011_31877_POD3_DDA3	DDA	3	31877	Paracentesis	POD3
1005_Porter_171222_Ps011_31877_Pre_DDA1	DDA	1	31877	Paracentesis	Pre
1005_Porter_171222_Ps011_31877_Pre_DDA2	DDA	2	31877	Paracentesis	Pre
1005_Porter_171222_Ps011_31877_Pre_DDA3	DDA	3	31877	Paracentesis	Pre
1005_Porter_171222_Ps011_31878_POD3_DDA1	DDA	1	31878	Paracentesis	POD3
1005_Porter_171222_Ps011_31878_POD3_DDA2	DDA	2	31878	Paracentesis	POD3
1005_Porter_171222_Ps011_31878_POD3_DDA3	DDA	3	31878	Paracentesis	POD3
1005_Porter_171222_Ps011_31878_Pre_DDA1	DDA	1	31878	Paracentesis	Pre
1005_Porter_171222_Ps011_31878_Pre_DDA2	DDA	2	31878	Paracentesis	Pre
1005_Porter_171222_Ps011_31878_Pre_DDA3	DDA	3	31878	Paracentesis	Pre
1005_Porter_171222_Ps011_31880_POD3_DDA1	DDA	1	31880	Paracentesis	POD3
1005_Porter_171222_Ps011_31880_POD3_DDA2	DDA	2	31880	Paracentesis	POD3
1005_Porter_171222_Ps011_31880_POD3_DDA3	DDA	3	31880	Paracentesis	POD3
1005_Porter_171222_Ps011_31880_Pre_DDA1	DDA	1	31880	Paracentesis	Pre
1005_Porter_171222_Ps011_31880_Pre_DDA2	DDA	2	31880	Paracentesis	Pre
1005_Porter_171222_Ps011_31880_Pre_DDA3	DDA	3	31880	Paracentesis	Pre
1005_Porter_171222_Ps011_31881_POD3_DDA1	DDA	1	31881	Paracentesis	POD3
1005_Porter_171222_Ps011_31881_POD3_DDA2	DDA	2	31881	Paracentesis	POD3
1005_Porter_171222_Ps011_31881_POD3_DDA3	DDA	3	31881	Paracentesis	POD3
1005_Porter_171222_Ps011_31881_Pre_DDA1	DDA	1	31881	Paracentesis	Pre
1005_Porter_171222_Ps011_31881_Pre_DDA2	DDA	2	31881	Paracentesis	Pre
1005_Porter_171222_Ps011_31881_Pre_DDA3	DDA	3	31881	Paracentesis	Pre
1005_Porter_171222_Ps011_31882_POD3_DDA1	DDA	1	31882	Paracentesis	POD3
1005_Porter_171222_Ps011_31882_POD3_DDA2	DDA	2	31882	Paracentesis	POD3
1005_Porter_171222_Ps011_31882_POD3_DDA3	DDA	3	31882	Paracentesis	POD3
1005_Porter_171222_Ps011_31882_Pre_DDA1	DDA	1	31882	Paracentesis	Pre
1005_Porter_171222_Ps011_31882_Pre_DDA2	DDA	2	31882	Paracentesis	Pre
1005_Porter_171222_Ps011_31882_Pre_DDA3	DDA	3	31882	Paracentesis	Pre
1005_Porter_171222_Ps011_31883_POD3_DDA1	DDA	1	31883	Lensectomy	POD3
1005_Porter_171222_Ps011_31883_POD3_DDA2	DDA	2	31883	Lensectomy	POD3
1005_Porter_171222_Ps011_31883_POD3_DDA3	DDA	3	31883	Lensectomy	POD3
1005_Porter_171222_Ps011_31883_Pre_DDA1	DDA	1	31883	Lensectomy	Pre
1005_Porter_171222_Ps011_31883_Pre_DDA2	DDA	2	31883	Lensectomy	Pre
1005_Porter_171222_Ps011_31883_Pre_DDA3	DDA	3	31883	Lensectomy	Pre
1005_Porter_171222_Ps011_31884_POD3_DDA1	DDA	1	31884	Lensectomy	POD3
1005_Porter_171222_Ps011_31884_POD3_DDA2	DDA	2	31884	Lensectomy	POD3
1005_Porter_171222_Ps011_31884_POD3_DDA3	DDA	3	31884	Lensectomy	POD3
1005_Porter_171222_Ps011_31884_Pre_DDA1	DDA	1	31884	Lensectomy	Pre
1005_Porter_171222_Ps011_31884_Pre_DDA2	DDA	2	31884	Lensectomy	Pre
1005_Porter_171222_Ps011_31884_Pre_DDA3	DDA	3	31884	Lensectomy	Pre
1005_Porter_171222_Ps011_31885_POD3_DDA1	DDA	1	31885	Lensectomy	POD3
1005_Porter_171222_Ps011_31885_POD3_DDA2	DDA	2	31885	Lensectomy	POD3
1005_Porter_171222_Ps011_31885_POD3_DDA3	DDA	3	31885	Lensectomy	POD3
1005_Porter_171222_Ps011_31885_Pre_DDA1	DDA	1	31885	Lensectomy	Pre
1005_Porter_171222_Ps011_31885_Pre_DDA2	DDA	2	31885	Lensectomy	Pre
1005_Porter_171222_Ps011_31885_Pre_DDA3	DDA	3	31885	Lensectomy	Pre
1005_Porter_171222_Ps011_31887_POD3_DDA1	DDA	1	31887	Paracentesis	POD3
1005_Porter_171222_Ps011_31887_POD3_DDA2	DDA	2	31887	Paracentesis	POD3
1005_Porter_171222_Ps011_31887_POD3_DDA3	DDA	3	31887	Paracentesis	POD3
1005_Porter_171222_Ps011_31887_Pre_DDA1	DDA	1	31887	Paracentesis	Pre
1005_Porter_171222_Ps011_31887_Pre_DDA2	DDA	2	31887	Paracentesis	Pre
1005_Porter_171222_Ps011_31887_Pre_DDA3	DDA	3	31887	Paracentesis	Pre
1005_Porter_171222_Ps011_31888_POD3_DDA1	DDA	1	31888	Paracentesis	POD3
1005_Porter_171222_Ps011_31888_POD3_DDA2	DDA	2	31888	Paracentesis	POD3
1005_Porter_171222_Ps011_31888_POD3_DDA3	DDA	3	31888	Paracentesis	POD3
1005_Porter_171222_Ps011_31888_Pre_DDA1	DDA	1	31888	Paracentesis	Pre
1005_Porter_171222_Ps011_31888_Pre_DDA2	DDA	2	31888	Paracentesis	Pre
1005_Porter_171222_Ps011_31888_Pre_DDA3	DDA	3	31888	Paracentesis	Pre
1005_Porter_171222_Ps011_31893_POD3_DDA1_IC	DDA	1	31893	Incision with suture	POD3
1005_Porter_171222_Ps011_31893_POD3_DDA2	DDA	2	31893	Incision with suture	POD3
1005_Porter_171222_Ps011_31893_POD3_DDA3	DDA	3	31893	Incision with suture	POD3
1005_Porter_171222_Ps011_31893_Pre_DDA1_IC	DDA	1	31893	Incision with suture	Pre
1005_Porter_171222_Ps011_31893_Pre_DDA2	DDA	2	31893	Incision with suture	Pre
1005_Porter_171222_Ps011_31893_Pre_DDA3	DDA	3	31893	Incision with suture	Pre
1005_Porter_171222_Ps011_31894_POD3_DDA1_IC	DDA	1	31894	Incision with suture	POD3
1005_Porter_171222_Ps011_31894_POD3_DDA2	DDA	2	31894	Incision with suture	POD3
1005_Porter_171222_Ps011_31894_POD3_DDA3	DDA	3	31894	Incision with suture	POD3
1005_Porter_171222_Ps011_31894_Pre_DDA1_IC	DDA	1	31894	Incision with suture	Pre
1005_Porter_171222_Ps011_31894_Pre_DDA2	DDA	2	31894	Incision with suture	Pre
1005_Porter_171222_Ps011_31894_Pre_DDA3	DDA	3	31894	Incision with suture	Pre
1005_Porter_171222_Ps011_31895_POD3_DDA1_IC	DDA	1	31895	Incision with suture	POD3
1005_Porter_171222_Ps011_31895_POD3_DDA2	DDA	2	31895	Incision with suture	POD3
1005_Porter_171222_Ps011_31895_POD3_DDA3	DDA	3	31895	Incision with suture	POD3
1005_Porter_171222_Ps011_31895_Pre_DDA1_IC	DDA	1	31895	Incision with suture	Pre
1005_Porter_171222_Ps011_31895_Pre_DDA2	DDA	2	31895	Incision with suture	Pre
1005_Porter_171222_Ps011_31895_Pre_DDA3	DDA	3	31895	Incision with suture	Pre
1005_Porter_171222_Ps011_31896_POD3_DDA1_IC	DDA	1	31896	Incision with suture	POD3
1005_Porter_171222_Ps011_31896_POD3_DDA2	DDA	2	31896	Incision with suture	POD3
1005_Porter_171222_Ps011_31896_POD3_DDA3	DDA	3	31896	Incision with suture	POD3
1005_Porter_171222_Ps011_31896_Pre_DDA1_IC	DDA	1	31896	Incision with suture	Pre
1005_Porter_171222_Ps011_31896_Pre_DDA2	DDA	2	31896	Incision with suture	Pre
1005_Porter_171222_Ps011_31896_Pre_DDA3	DDA	3	31896	Incision with suture	Pre
1005_Porter_171222_Ps011_31897_POD3_DDA1_IC	DDA	1	31897	Incision with suture	POD3
1005_Porter_171222_Ps011_31897_POD3_DDA2	DDA	2	31897	Incision with suture	POD3
1005_Porter_171222_Ps011_31897_POD3_DDA3	DDA	3	31897	Incision with suture	POD3
1005_Porter_171222_Ps011_31897_Pre_DDA1_IC	DDA	1	31897	Incision with suture	Pre
1005_Porter_171222_Ps011_31897_Pre_DDA2	DDA	2	31897	Incision with suture	Pre
1005_Porter_171222_Ps011_31897_Pre_DDA3	DDA	3	31897	Incision with suture	Pre
1005_Porter_171222_Ps011_31898_POD3_DDA1_IC	DDA	1	31898	Incision with suture	POD3
1005_Porter_171222_Ps011_31898_POD3_DDA2	DDA	2	31898	Incision with suture	POD3
1005_Porter_171222_Ps011_31898_POD3_DDA3	DDA	3	31898	Incision with suture	POD3
1005_Porter_171222_Ps011_31898_Pre_DDA1_IC	DDA	1	31898	Incision with suture	Pre
1005_Porter_171222_Ps011_31898_Pre_DDA2	DDA	2	31898	Incision with suture	Pre
1005_Porter_171222_Ps011_31898_Pre_DDA3	DDA	3	31898	Incision with suture	Pre
1099_Porter_190224_Ts006_31818_POD3_01	PRM	1	31818	Lensectomy with IOL	POD3
1099_Porter_190224_Ts006_31818_Pre_01	PRM	1	31818	Lensectomy with IOL	Pre
1099_Porter_190224_Ts006_31819_POD3_01	PRM	1	31819	Lensectomy with IOL	POD3
1099_Porter_190224_Ts006_31819_Pre_01	PRM	1	31819	Lensectomy with IOL	Pre
1099_Porter_190224_Ts006_31822_POD3_01	PRM	1	31822	Lensectomy with IOL	POD3
1099_Porter_190224_Ts006_31822_Pre_01	PRM	1	31822	Lensectomy with IOL	Pre
1099_Porter_190224_Ts006_31864_POD3_01	PRM	1	31864	Lensectomy with IOL	POD3
1099_Porter_190224_Ts006_31864_Pre_01	PRM	1	31864	Lensectomy with IOL	Pre
1099_Porter_190224_Ts006_31865_POD3_01	PRM	1	31865	Lensectomy with IOL	POD3
1099_Porter_190224_Ts006_31865_Pre_01	PRM	1	31865	Lensectomy with IOL	Pre
1099_Porter_190224_Ts006_31872_POD3_01	PRM	1	31872	Lensectomy	POD3
1099_Porter_190224_Ts006_31872_Pre_01	PRM	1	31872	Lensectomy	Pre
1099_Porter_190224_Ts006_31873_POD3_01	PRM	1	31873	Lensectomy	POD3
1099_Porter_190224_Ts006_31873_Pre_01	PRM	1	31873	Lensectomy	Pre
1099_Porter_190224_Ts006_31874_POD3_01	PRM	1	31874	Lensectomy	POD3
1099_Porter_190224_Ts006_31874_Pre_01	PRM	1	31874	Lensectomy	Pre
1099_Porter_190224_Ts006_31876_POD3_01	PRM	1	31876	Paracentesis	POD3
1099_Porter_190224_Ts006_31876_Pre_01	PRM	1	31876	Paracentesis	Pre
1099_Porter_190224_Ts006_31877_POD3_01	PRM	1	31877	Paracentesis	POD3
1099_Porter_190224_Ts006_31877_Pre_01	PRM	1	31877	Paracentesis	Pre
1099_Porter_190224_Ts006_31878_POD3_01	PRM	1	31878	Paracentesis	POD3
1099_Porter_190224_Ts006_31878_Pre_01	PRM	1	31878	Paracentesis	Pre
1099_Porter_190224_Ts006_31881_POD3_01	PRM	1	31881	Paracentesis	POD3
1099_Porter_190224_Ts006_31881_Pre_01	PRM	1	31881	Paracentesis	Pre
1099_Porter_190224_Ts006_31883_POD3_01	PRM	1	31883	Lensectomy	POD3
1099_Porter_190224_Ts006_31883_Pre_01	PRM	1	31883	Lensectomy	Pre
1099_Porter_190224_Ts006_31884_POD3_01	PRM	1	31884	Lensectomy	POD3
1099_Porter_190224_Ts006_31884_Pre_01	PRM	1	31884	Lensectomy	Pre
1099_Porter_190224_Ts006_31885_POD3_01	PRM	1	31885	Lensectomy	POD3
1099_Porter_190224_Ts006_31885_Pre_01	PRM	1	31885	Lensectomy	Pre
1099_Porter_190224_Ts006_31887_POD3_01	PRM	1	31887	Paracentesis	POD3
1099_Porter_190224_Ts006_31887_Pre_01	PRM	1	31887	Paracentesis	Pre
1099_Porter_190224_Ts006_31888_POD3_01	PRM	1	31888	Paracentesis	POD3
1099_Porter_190224_Ts006_31888_Pre_01	PRM	1	31888	Paracentesis	Pre
1099_Porter_190224_Ts006_PooledQC-0o2fmol_01	PRM	1	PooledQC	PooledQC	PooledQC
1099_Porter_190224_Ts006_PooledQC-0o4fmol_01	PRM	1	PooledQC	PooledQC	PooledQC
1099_Porter_190224_Ts006_PooledQC-1fmol_01	PRM	1	PooledQC	PooledQC	PooledQC
1099_Porter_190224_Ts006_PooledQC-2fmol_01	PRM	1	PooledQC	PooledQC	PooledQC
1099_Porter_190224_Ts006_PooledQC-10fmol_01	PRM	1	PooledQC	PooledQC	PooledQC
1099_Porter_190224_Ts006_PooledQC-20fmol_01	PRM	1	PooledQC	PooledQC	PooledQC
1099_Porter_190224_Ts006_PooledQC-100fmol_01	PRM	1	PooledQC	PooledQC	PooledQC
