# Supplementary material for: Quantitative proteomic analysis of aqueous humor after rabbit lensectomy reveals differences in coagulation and immunomodulatory proteins
Source: Royal Society of Chemistry journal article supplement (doi:10.1039/c9mo00169g), 2020-01-21
Supplement: c9mo00169g4.xlsx [file c9mo00169g4.xlsx]

## Sheet: Total Peak Area Dil Series
	Technical Injection 1 - Total Peak Area - Pooled QC Dilution Series								Technical Injection 2 - Total Peak Area - Pooled QC Dilution Series
Modified Sequence	190224_Ts006_PooledQC-0o2fmol_01 Sum Total Area Fragment	190224_Ts006_PooledQC-0o4fmol_01 Sum Total Area Fragment	190224_Ts006_PooledQC-1fmol_01 Sum Total Area Fragment	190224_Ts006_PooledQC-2fmol_01 Sum Total Area Fragment	190224_Ts006_PooledQC-10fmol_01 Sum Total Area Fragment	190224_Ts006_PooledQC-20fmol_01 Sum Total Area Fragment	190224_Ts006_PooledQC-100fmol_01 Sum Total Area Fragment		190224_Ts006_PooledQC-0o2fmol_02 Sum Total Area Fragment	190224_Ts006_PooledQC-0o4fmol_02 Sum Total Area Fragment	190224_Ts006_PooledQC-1fmol_02 Sum Total Area Fragment	190224_Ts006_PooledQC-2fmol_02 Sum Total Area Fragment	190224_Ts006_PooledQC-10fmol_02 Sum Total Area Fragment	190224_Ts006_PooledQC-20fmol_02 Sum Total Area Fragment	190224_Ts006_PooledQC-100fmol_02 Sum Total Area Fragment
IELYQILK[+8]	103733	302795	1185818	6292924	47066712	400103264	1296210176		3020113	374574	821843	4311528	36682344	354756096	1025935936
FAGIDGTSTYTSGDQK[+8]	91790	558407	4033986	12849066	80741696	335735808	1401164288		294323	580772	2962511	8963880	59264800	268659520	1091477248
ALDAAYC[+57]FR[+10]	839396	2482935	9945605	33346196	198440768	606783232	2472879104		990743	1925216	6825301	23468796	138733744	451623424	1819285120
DNENAINEYSLELEK[+8]	295368	710125	4035922	23706566	114048624	218679872	880649280		490271	689199	3377748	20723342	101148160	167451936	692891840
IYIDETVNSNIPTNLR[+10]	40932	31887	74785	1308320	12215640	88541552	196942096		68658	0	147129	650411	4722829	38811984	137730720
EGFGNIAR[+10]	7414667	14654561	36645704	80867640	341589312	640423424	2487114240		5433977	14376115	27588626	53433924	238506256	477710144	1817940608
VDDLPGQEVLSK[+8]	4568817	9699972	27828836	106358720	433241888	815478656	3652034816		4098588	8029049	22142080	83503024	342733440	693121920	2953985280
AILVGEQTVGGALDLQK[+8]	0	0	243379	1552967	16669090	118654583	421502688		1647420	0	208129	423710	7712168	55090757	248951108
FAEASVLEALGPQVLR[+10]	0	0	0	620099	13436143	78413460	375578496		0	0	0	0	142893	9985204	67973203
	Average of two technical injections - Dilution Series - Pooled QC
IELYQILK[+8]	1561923	338684	1.00383e+06	5302226	41874528	377429680	1161073056
FAGIDGTSTYTSGDQK[+8]	193056	569590	3.49825e+06	10906473	70003248	302197664	1246320768
ALDAAYC[+57]FR[+10]	915070	2.20408e+06	8385453	28407496	168587256	529203328	2146082112
DNENAINEYSLELEK[+8]	392820	699662	3706835	22214954	107598392	193065904	786770560
IYIDETVNSNIPTNLR[+10]	54795	15943.5	110957	979366	8.46923e+06	63676768	167336408
EGFGNIAR[+10]	6424322	14515338	32117165	67150782	290047784	559066784	2152527424
VDDLPGQEVLSK[+8]	4.3337e+06	8.86451e+06	24985458	94930872	387987664	754300288	3303010048
AILVGEQTVGGALDLQK[+8]	823710	0	225754	988338	12190629	86872670	335226898
FAEASVLEALGPQVLR[+10]	0	0	0	310050	6789518	44199332	2.21776e+08
	Average of two technical injections - Dilution Series - Pooled QC								Log Transform of Data
Concentrations (fmol)	0.2	0.4	1	2	10	20	100		-0.69897	-0.39794	0	0.30103	1	1.30103	2
IELYQILK[+8]	1561923	338684	1.00383e+06	5302226	41874528	377429680	1161073056		6.19366	5.5298	6.00166	6.72446	7.62195	8.57684	9.06486
FAGIDGTSTYTSGDQK[+8]	193056	569590	3.49825e+06	10906473	70003248	302197664	1246320768		5.28568	5.75556	6.54385	7.03768	7.84512	8.48029	9.09563
ALDAAYC[+57]FR[+10]	915070	2.20408e+06	8385453	28407496	168587256	529203328	2146082112		5.96145	6.34323	6.92353	7.45343	8.22682	8.72362	9.33165
DNENAINEYSLELEK[+8]	392820	699662	3706835	22214954	107598392	193065904	786770560		5.59419	5.84489	6.569	7.34665	8.03181	8.28571	8.89585
IYIDETVNSNIPTNLR[+10]	54795	15943.5	110957	979366	8.46923e+06	63676768	167336408		4.73874	4.20258	5.04515	5.99094	6.92784	7.80398	8.22359
EGFGNIAR[+10]	6424322	14515338	32117165	67150782	290047784	559066784	2152527424		6.80783	7.16183	7.50674	7.82705	8.46247	8.74746	9.33295
VDDLPGQEVLSK[+8]	4.3337e+06	8.86451e+06	24985458	94930872	387987664	754300288	3303010048		6.63686	6.94765	7.39769	7.97741	8.58882	8.87754	9.51891
AILVGEQTVGGALDLQK[+8]	823710	0	225754	988338	12190629	86872670	335226898		5.91577	#NUM!	5.35364	5.99491	7.08603	7.93888	8.52534
FAEASVLEALGPQVLR[+10]	0	0	0	310050	6789518	44199332	2.21776e+08		#NUM!	#NUM!	#NUM!	5.49143	6.83184	7.64542	8.34591
Sample ID			31872_Pre_01	31873_Pre_01	31874_Pre_01	31883_Pre_01	31884_Pre_01	31885_Pre_01	31872_POD3_01	31873_POD3_01	31874_POD3_01	31883_POD3_01	31884_POD3_01	31885_POD3_01	31818_Pre_01	31819_Pre_01	31822_Pre_01	31864_Pre_01	31865_Pre_01	31818_POD3_01	31819_POD3_01	31822_POD3_01	31864_POD3_01	31865_POD3_01	31876_Pre_01	31877_Pre_01	31878_Pre_01	31881_Pre_01	31887_Pre_01	31888_Pre_01	31876_POD3_01	31877_POD3_01	31878_POD3_01	31881_POD3_01	31887_POD3_01	31888_POD3_01
Modified Sequence
IELYQILK (Total Peak Area)			400476	1386071	1168330	787959	1075150	1185110	96754	45511	125925	253296	40044	249274	1562442	1730015	1259247	652012	712135	0	34393	99835	85123	91511	3485851	3024608	3443081	305787	465532	2534286	1775805	1055750	2143848	2851559	3307751	1833073
Log 10 of Peak area (light)			5.60258	6.14179	6.06757	5.8965	6.03147	6.07376	4.98567	4.65812	5.10011	5.40363	4.60254	5.39668	6.1938	6.23805	6.10011	5.81426	5.85256	#NUM!	4.53647	4.99928	4.93005	4.96147	6.54231	6.48067	6.53695	5.48542	5.66795	6.40386	6.2494	6.02356	6.33119	6.45508	6.51953	6.26318
Concentration (light)			-0.356293	-0.0110229	-0.058548	-0.168084	-0.0816616	-0.0545824	-0.751317	-0.961058	-0.678036	-0.483686	-0.996646	-0.488137	0.0222859	0.0506178	-0.0377083	-0.220749	-0.196221	#NUM!	-1.03895	-0.742599	-0.786933	-0.76681	0.245443	0.205974	0.24201	-0.431313	-0.314433	0.156788	0.0578826	-0.0867253	0.110261	0.18959	0.230859	0.0667092
10^Concentration (light)			0.440257	0.974938	0.87388	0.679073	0.828588	0.881896	0.17729	0.109381	0.209877	0.328333	0.100775	0.324985	1.05265	1.12362	0.916836	0.601521	0.636472	#NUM!	0.0914216	0.180884	0.16333	0.171076	1.75972	1.60684	1.74586	0.370414	0.484805	1.43479	1.14257	0.818983	1.28902	1.54735	1.70161	1.16603
FAGIDGTSTYTSGDQK (Total Peak Area)			37778	453257	471669	321503	381528	270418	0	0	0	0	0	0	293090	720644	594105	132070	306482	0	0	32037	74915	91557	1857144	1899823	1867639	107691	91427	1517692	1117316	305711	682408	2130024	2413747	1061175
Log 10 of Peak area (light)			4.57724	5.65634	5.67364	5.50719	5.58153	5.43204	#NUM!	#NUM!	#NUM!	#NUM!	#NUM!	#NUM!	5.467	5.85772	5.77386	5.1208	5.4864	#NUM!	#NUM!	4.50565	4.87457	4.96169	6.26885	6.27871	6.27129	5.03218	4.96107	6.18118	6.04818	5.48531	5.83404	6.32838	6.38269	6.02579
Concentration (light)			-1.29138	-0.539444	-0.527394	-0.64338	-0.591578	-0.695746	#NUM!	#NUM!	#NUM!	#NUM!	#NUM!	#NUM!	-0.671381	-0.399121	-0.457555	-0.912616	-0.65786	#NUM!	#NUM!	-1.34126	-1.0842	-1.02349	-0.112643	-0.105767	-0.110938	-0.974372	-1.02392	-0.173728	-0.266409	-0.658622	-0.41562	-0.0711557	-0.0333135	-0.28201
10^Concentration (light)			0.0511233	0.288773	0.296897	0.227311	0.256107	0.20149	0	0	0	0	0	0	0.213117	0.398913	0.348695	0.122288	0.219857	0	0	0.045576	0.0823764	0.0947352	0.771537	0.783849	0.774572	0.106079	0.0946415	0.670305	0.54149	0.219471	0.384043	0.848876	0.926161	0.522384
ALDAAYC[+57]FR (Total Peak Area)			245584	738081	1039627	730727	1219711	957688	226095	228619	92836	418432	319198	208942	1306112	1341010	1232408	251093	445522	495022	162217	408022	328955	519294	2916315	3362598	2286174	235321	249387	2737787	2629322	636771	1451129	2794306	3967027	1713896
Log 10 of Peak area (light)			5.3902	5.8681	6.01688	5.86376	6.08626	5.98122	5.35429	5.35911	4.96772	5.62162	5.50406	5.32003	6.11598	6.12743	6.09075	5.39983	5.64887	5.69462	5.2101	5.61068	5.51714	5.71541	6.46483	6.52667	6.35911	5.37166	5.39687	6.4374	6.41984	5.80398	6.16171	6.44627	6.59847	6.23398
Concentration (light)			-1.19753	-0.82455	-0.708439	-0.827944	-0.654291	-0.736265	-1.22556	-1.2218	-1.52726	-1.01692	-1.10867	-1.2523	-0.631093	-0.622156	-0.650781	-1.19001	-0.995654	-0.959943	-1.3381	-1.02546	-1.09847	-0.943719	-0.358827	-0.310564	-0.441341	-1.212	-1.19233	-0.380239	-0.393941	-0.874594	-0.595406	-0.373313	-0.254534	-0.538996
10^Concentration (light)			0.0634551	0.149779	0.195687	0.148613	0.221671	0.183542	0.0594896	0.0600072	0.0296986	0.0961797	0.0778627	0.0559369	0.233834	0.238696	0.22347	0.0645633	0.101006	0.109662	0.0459096	0.0943071	0.079714	0.113836	0.437696	0.489144	0.361958	0.0613758	0.0642207	0.41664	0.403701	0.133477	0.25386	0.423338	0.556501	0.289071
DNENAINEYSLELEK			30873220	18364348	15169362	9173103	13523065	31741424	147767392	57269224	100251328	75864120	65707448	157756528	42570648	22423838	41772140	8815422	14439500	81821152	89609136	117391320	99075024	96302984	62588876	54364400	44133716	5386622	3514709	35098988	42980096	2104716	58082404	42629300	83166240	3446681
Log 10 of Peak area (light)			7.48958	7.26398	7.18097	6.96252	7.13108	7.50163	8.16958	7.75792	8.00109	7.88004	7.81761	8.19799	7.62911	7.35071	7.62089	6.94524	7.15955	7.91287	7.95235	8.06964	7.99596	7.98364	7.7965	7.73531	7.64477	6.73132	6.54589	7.54529	7.63327	6.32319	7.76404	7.62971	7.91995	6.5374
Concentration (light)			0.708407	0.532001	0.467095	0.296283	0.428083	0.717825	1.24011	0.918228	1.10837	1.01371	0.964903	1.26232	0.817507	0.59982	0.811077	0.282777	0.45035	1.03938	1.07026	1.16196	1.10436	1.09472	0.948391	0.900551	0.829753	0.115503	-0.0294868	0.75197	0.820758	-0.203618	0.923016	0.817975	1.04492	-0.0361239
10^Concentration (light)			5.10984	3.40409	2.93153	1.97826	2.67968	5.22186	17.3825	8.28376	12.8341	10.3208	9.22366	18.2947	6.56912	3.97942	6.47258	1.91768	2.82065	10.9492	11.7559	14.5199	12.7162	12.4372	8.87955	7.95337	6.75698	1.30468	0.934358	5.64898	6.61848	0.625723	8.37559	6.5762	11.0897	0.920187
EGFGNIAR			68633792	36959396	33652912	25089516	32652680	78685416	278313120	142996944	274554272	211613248	119494312	256989248	96789712	56494112	98877568	21742462	31539112	211051616	259265488	304003808	292989312	256078432	115240088	100711536	70555368	14947706	8816385	72554936	82861064	4073850	116268152	74984064	153664304	7156088
Log 10 of Peak area (light)			7.83654	7.56772	7.52702	7.39949	7.51392	7.89589	8.44453	8.15533	8.43863	8.32554	8.07735	8.40991	7.98583	7.752	7.9951	7.33731	7.49885	8.32439	8.41374	8.48288	8.46685	8.40837	8.0616	8.00308	7.84853	7.17457	6.94529	7.86067	7.91835	6.61001	8.06546	7.87497	8.18657	6.85468
Concentration (light)			0.348958	0.0607172	0.0170734	-0.119674	0.00302255	0.412604	1.00089	0.690786	0.994562	0.873304	0.607171	0.963773	0.509038	0.258314	0.518977	-0.186351	-0.0131359	0.872066	0.96788	1.04201	1.02482	0.96212	0.590289	0.527535	0.361816	-0.360847	-0.606701	0.374831	0.436683	-0.966218	0.594425	0.390166	0.72429	-0.703865
10^Concentration (light)			2.23335	1.15005	1.0401	0.759148	1.00698	2.58585	10.0206	4.90666	9.87556	7.46971	4.04735	9.19969	3.22878	1.81265	3.30352	0.651101	0.970206	7.44845	9.28709	11.0157	10.5883	9.16473	3.89304	3.36926	2.30047	0.435666	0.247343	2.37045	2.73327	0.108089	3.93029	2.45565	5.30017	0.197759
VDDLPGQEVLSK			4298379	7535404	7877117	12509469	13055924	11859823	3347009	1365673	2054885	4299906	3433992	2666422	13177546	19990780	14290839	7860064	9502285	2370128	4253168	5295213	2279267	1928223	14997286	19396052	26454052	7962955	11147583	25959000	16155128	6637527	12681069	19858612	23222750	12142134
Log 10 of Peak area (light)			6.6333	6.87711	6.89637	7.09724	7.11581	7.07408	6.52466	6.13535	6.31279	6.63346	6.5358	6.42593	7.11983	7.30083	7.15506	6.89543	6.97783	6.37477	6.62871	6.72388	6.3578	6.28516	7.17601	7.28771	7.42249	6.90107	7.04718	7.41429	7.20831	6.82201	7.10316	7.29795	7.36591	7.0843
Concentration (light)			-0.750917	-0.526339	-0.508597	-0.323564	-0.306459	-0.344898	-0.850998	-1.20961	-1.04616	-0.750775	-0.840734	-0.941941	-0.30275	-0.136026	-0.270304	-0.509464	-0.433559	-0.989064	-0.755147	-0.66748	-1.0047	-1.07161	-0.251002	-0.148109	-0.0239571	-0.504261	-0.369675	-0.0315144	-0.221251	-0.577094	-0.318114	-0.13868	-0.0760744	-0.335487
10^Concentration (light)			0.177453	0.297619	0.31003	0.474718	0.493788	0.451962	0.14093	0.0617148	0.0899164	0.177511	0.1443	0.114303	0.498024	0.731095	0.536656	0.309411	0.368503	0.10255	0.175733	0.21504	0.0989231	0.0847983	0.561046	0.711036	0.946331	0.31314	0.426899	0.930006	0.600827	0.264792	0.480714	0.726641	0.839316	0.461863
