# Supplementary material for: Quantitative proteomic analysis of aqueous humor after rabbit lensectomy reveals differences in coagulation and immunomodulatory proteins
Source: Royal Society of Chemistry journal article supplement (doi:10.1039/c9mo00169g), 2020-01-21
Supplement: c9mo00169g5.xlsx [file c9mo00169g5.xlsx]

## Sheet: Sheet1
Protein	Transforming growth factor beta 2	Charge State	Targeted m/z	Targeted m/z (SIL)	HCD Collision Energy
Peptide 1	R.IELYQILK.S	2+	510.31	514.317	27.5
Peptide 2	R.FAGIDGTSTYTSGDQK.T	2+	824.379	828.386	30
Peptide 3	R.ALDAAYCFR.N	2+	543.755	548.76	30
Protein	Fibrinogen beta chain
Peptide 1	K.DNENAINEYSLELEK.Q	2+	890.915	894.923	30
Peptide 2	K.IYIDETVNSNIPTNLR.V	2+	931.486	936.49	27.5
Peptide 3	K.EGFGNIAR.N	2+	432.222	437.226	25
Protein	Retinol-binding protein 3
Peptide 1	R.VDDLPGQEVLSK.L	2+	650.343	654.35	27.5
Peptide 2	R.AILVGEQTVGGALDLQK.L	2+	856.483	860.49	25
Peptide 3	R.FAEASVLEALGPQVLR.Q	2+	850.472	855.477	27.5
