# Supplementary material for: Quantitative proteomic analysis of aqueous humor after rabbit lensectomy reveals differences in coagulation and immunomodulatory proteins
Source: Royal Society of Chemistry journal article supplement (doi:10.1039/c9mo00169g), 2020-01-21
Supplement: c9mo00169g7.xlsx [file c9mo00169g7.xlsx]

## Sheet: Sheet1
			Lensectomy with IOL						Lensectomy with IOL						Lensectomy with IOL						Lensectomy with IOL						Lensectomy with IOL						Aphakia						Aphakia						Aphakia
Protein (Accession ID)	Number of Peptides	Peptide	31818_POD3_DIA1 (Total Fragment Area)	31818_POD3_DIA2 (Total Fragment Area)	31818_POD3_DIA3 (Total Fragment Area)	31818_Pre_DIA1 (Total Fragment Area)	31818_Pre_DIA2 (Total Fragment Area)	31818_Pre_DIA3 (Total Fragment Area)	31819_POD3_DIA1 (Total Fragment Area)	31819_POD3_DIA2 (Total Fragment Area)	31819_POD3_DIA3 (Total Fragment Area)	31819_Pre_DIA1 (Total Fragment Area)	31819_Pre_DIA2 (Total Fragment Area)	31819_Pre_DIA3 (Total Fragment Area)	31822_POD3_DIA1 (Total Fragment Area)	31822_POD3_DIA2 (Total Fragment Area)	31822_POD3_DIA3 (Total Fragment Area)	31822_Pre_DIA1 (Total Fragment Area)	31822_Pre_DIA2 (Total Fragment Area)	31822_Pre_DIA3 (Total Fragment Area)	31864_POD3_DIA1 (Total Fragment Area)	31864_POD3_DIA2 (Total Fragment Area)	31864_POD3_DIA3 (Total Fragment Area)	31864_Pre_DIA1 (Total Fragment Area)	31864_Pre_DIA2 (Total Fragment Area)	31864_Pre_DIA3 (Total Fragment Area)	31865_POD3_DIA1 (Total Fragment Area)	31865_POD3_DIA2 (Total Fragment Area)	31865_POD3_DIA3 (Total Fragment Area)	31865_Pre_DIA1 (Total Fragment Area)	31865_Pre_DIA2 (Total Fragment Area)	31865_Pre_DIA3 (Total Fragment Area)	31872_POD3_DIA1 (Total Fragment Area)	31872_POD3_DIA2 (Total Fragment Area)	31872_POD3_DIA3 (Total Fragment Area)	31872_Pre_DIA1 (Total Fragment Area)	31872_Pre_DIA2 (Total Fragment Area)	31872_Pre_DIA3 (Total Fragment Area)	31873_POD3_DIA1 (Total Fragment Area)	31873_POD3_DIA2 (Total Fragment Area)	31873_POD3_DIA3 (Total Fragment Area)	31873_Pre_DIA1 (Total Fragment Area)	31873_Pre_DIA2 (Total Fragment Area)	31873_Pre_DIA3 (Total Fragment Area)	31874_POD3_DIA1 (Total Fragment Area)	31874_POD3_DIA2 (Total Fragment Area)	31874_POD3_DIA3 (Total Fragment Area)	31874_Pre_DIA1 (Total Fragment Area)	31874_Pre_DIA2 (Total Fragment Area)
G1TAC0	1	SCSCAPGYELADDHLQCEPAVR	10122662	13106363	12804620	5883541	4368889	5675673	11998921	11641056	10416898	4299950	4303808	4351574	6775601	2360984	10278205	2595863	2053966	2371711	13130430	10529836	10748425	2751718	1213298	3059015	12924008	14504978	11477478	2969596	3562608	3831327	13653868	12738821	12545936	5289077	4371732	6723625	11636683	9005506	10390248	3461197	3717835	4640765	14708463	12462928	13203904	3468149	3307026
G1T8T3	4	HQSVFTVTR	96162360	101643752	98040160	68732928	72473648	77938464	89024736	89611496	92228192	39957100	39108804	42439304	115949944	118350800	119239784	34155332	35231124	40269520	91759128	98868080	95336576	25419586	24819270	25992964	101661568	102543496	103551392	27107676	31552850	32297478	85834712	84927256	94419400	44678624	47500644	57904936	104667304	94010048	110220216	24052338	26123444	30515546	69436368	69124704	83209032	20055038	19755732
		QTAQFPESNSLVR	38868212	37852436	34293048	33281868	31928644	30719134	33988632	33976324	32385888	12895739	12161948	5550241	59155720	54578164	58521096	20318132	19042690	18188174	37477316	37471944	33781548	6902723	12669103	12685193	28525594	26615620	27359740	15626393	15918176	15671765	33658540	30679872	35564592	13750339	12099803	14508900	29506368	29542750	33492908	6538177	7394869	8408502	27509892	24043418	29955442	6880688	5908242
		FNTAITNPQGDYDTSTGK	12219254	10784720	11677944	7892311	7885175	7846124	7890913	9895048	9444557	3072545	2831588	3096175	17501092	16677797	16079278	5492190	4739352	5572023	8852912	11575063	11497832	3314549	3189804	3146380	9376238	9801426	10218295	4024590	4130884	4479882	10888535	9657404	10734965	4055174	3689248	4212185	9951840	9194974	11646162	2029228	2031352	2430282	8448542	7091780	8572842	582467	1677194
		QVSSGGVLLR	21393344	21879754	20922292	18038120	18933632	17679764	20778188	19268050	18877142	5777203	5082824	5031696	30441182	27944944	31365196	12626575	11857611	11473297	22495966	23315036	23429940	5267916	5791919	5411052	16742960	16183806	18019238	8659450	7957853	7830162	21354272	19579412	22805704	6696859	7272039	9701592	23102086	19389444	24479774	4407317	4604991	5085003	20309530	18943082	25963268	4568453	3351913
G1TKX3	8	ENCCILDQR	1820377344	1861910272	621907072	918752064	934008896	922349632	1748065408	608996928	1861840256	484779392	495266144	476884864	1937667840	1970314496	1965225600	929543296	899607104	939979328	1958186880	2075119872	2084024576	256265968	260987040	272687968	1931636480	1971598080	2033995776	288213568	307762752	301834240	1781239552	1750865280	2001466240	607028608	539800384	707506112	1091368064	925753536	1095940992	295072480	298664160	349500288	1993057024	1930727424	2407479552	267481344	252079392
		VSYDTAEPSVPNK	1070774912	1082479488	1064955840	179710896	183507088	180035040	539537664	528129184	528115136	94204896	98680440	95832800	966537664	978395712	996210816	192806144	191838720	175593296	1107071872	1114956800	1093812736	58876612	60509904	65726696	1276259328	1246458368	1244391808	73345480	78126984	77456424	519038528	494082368	593209856	168560288	116098208	244727920	439184192	386408544	456481184	62039844	62130824	74399968	627410368	601609088	751582208	55777088	49576776
		YEALILSHESSIR	913580160	970536512	979853504	374527200	393659712	406484160	714308224	724010048	760185088	199068336	223511232	217050544	1172855424	1255806080	1255820672	428385984	428334336	433131296	981032704	1082006272	1079948672	121537024	133130584	139416032	1137565312	1201682816	1209631104	121385912	140821296	137104480	879550208	747269760	923665152	234453280	193936704	291061664	447970176	488061600	592220800	131140656	136990272	190522240	896763008	879694656	1165847680	148342352	112002312
		ESGLYFLKPLR	1413687296	1370992128	1439764992	618862976	557699392	562133504	1373232768	1385642624	1390923776	340705632	301377248	314139232	2215825152	2172710912	2183318528	664007296	619702720	539440768	1643553024	1551335424	1684835584	183493488	170391856	180746720	1631250176	1550713216	1643251072	166756192	163869072	171326304	1509444608	1592752896	1377684608	324332096	300468480	288904992	777947840	793856192	726691968	223805504	219697968	203666992	1467656832	1526794496	1368610304	193986208	197924560
		EGFGHLSPTGTTEFWLGNEK	854831552	883248640	935080960	294088256	260338800	272519968	746157440	735885120	777523072	179779968	196219744	193688448	1433569920	1390815744	1460130176	330207232	313156768	324393952	973968768	996049984	1041976704	116230440	107378256	116663888	1129869568	1141739392	1188314112	94022544	104457632	110237752	767120832	738677696	868768832	195797680	179877392	213851744	413725856	437835168	516628928	119889344	112926752	147562512	917067968	873503616	1077531392	100966432	92062392
		IHLISTQSAIPYALR	280625120	270452448	280999232	120073496	132039856	126543512	361087072	324766144	375973056	48690272	53442504	53577968	545519616	615258816	605297088	107563168	117860816	95486048	294785088	332634144	358109184	44361632	39805520	41964148	227918496	218457216	222972704	21858142	25619320	27131068	401751360	454601088	385460064	61883168	58950532	46047660	166315200	173797568	146313856	42352992	40696376	33856840	428359360	439371808	363826112	62125560	63093276
		IQLEDWDGK	1263513856	1277923584	1260998016	539272192	517567904	543986560	1106949120	1070166400	1073317056	301375136	305063296	286888928	1911670656	1811070976	1843750656	558590528	509214464	515894720	1452806144	1481201536	1450126592	176647680	170626336	183180320	1630605312	1597657472	1625182592	178394112	187673760	179809808	1135107840	1111019776	1218920064	369393088	294572224	371678208	590822400	666046976	743960512	181526688	191005056	222409248	1221287936	1182927104	1414632064	169893552	150266880
		LSIGEGQQFHVGGAK	244783920	241555264	235700096	113838336	108715208	112779072	196336768	190844080	172405984	61507564	55569904	60051140	320783040	324136480	306382432	132908968	130595088	118468192	316289088	282711200	304612992	38473792	36140708	36102820	316854592	288610688	296952128	34962432	31990742	35942524	304127392	283643968	244112304	19695790	22120328	16661042	129722744	117147112	113929552	46876196	46938628	43242264	300305024	293553152	263509504	47933348	43268924
G1T0X2	6	EADWPFCADDDWNQK	300018880	294855904	296298272	107917184	99538920	100312944	227520736	225838032	225998784	52372888	48448480	47990752	295630016	268048544	272585024	107638624	100653312	96271536	337398560	321662688	335540768	35849280	31702628	34249612	426920768	383996416	387657888	29566332	30305184	29195948	294170368	289292064	282460224	72176624	61937712	61367872	145323392	152537584	156600000	37212692	33096058	34020888	338678048	293860256	313042816	33899208	29250640
		NSLFDYQK	504943712	538682176	536391904	174531744	235108992	238143248	481987392	488148512	506335744	126632544	133503456	109751096	762571648	776725312	787664064	238443440	244939344	252086976	563160192	602071808	599660032	75614768	77597464	80734112	649732544	652475968	659116352	77246432	73289864	85669176	555199424	508960192	597330048	175662736	163102416	208459680	277181216	272218624	342944064	86734312	73798656	116770944	517229920	506890528	669848768	76065448	73548872
		DSSSVVTNIMEYLR	397026944	452523680	576160512	50888564	54355444	58003576	177127008	212987632	287012352	30370170	37550308	41429752	856584256	816573504	888080128	22180492	25396790	26511730	543508480	639260032	747266816	41232040	40643692	40981312	837151232	882994240	967434624	8231414	8604244	8468769	675028736	663303104	714736768	48686588	41203520	49010916	382499744	383930784	430597312	13434794	14198973	17836066	777987136	733472896	793749120	23377434	21812834
		AQLIDMK	394958432	413353632	432279616	224309920	227913360	246635264	386710592	384238560	419258016	119295368	132390432	124035488	633392256	672216640	730618560	230206224	218347936	236466032	443827328	467650816	471370752	55406496	56960276	62391364	451686336	460877600	492537696	69684896	78667656	75008584	422115840	395598080	476786048	90677376	106632192	121086344	262309088	71147960	291813216	72602768	70760200	90960424	483127488	458546016	634051968	66426320	62873608
		MADEAGGEADQELR	528649920	544458240	535842784	207123072	214138112	204992752	469368384	466206176	475128416	112572744	110939632	107155904	743112064	737254720	765696896	240504512	224223600	230831504	651917056	687966784	697941952	52342692	54218000	55698168	624350656	614697344	618889984	55432552	53881512	54076832	447886848	425269920	502757472	84544240	70154896	93951648	290953312	249421168	292981344	63609460	55574724	67520008	634251648	565936704	717436288	52304600	47918332
		GAYAEYHFR	20006442	19246912	20145182	9205197	9333278	8622543	19166464	20212452	18905532	3472889	4034955	3776345	23777758	21704436	24654428	11120954	10962713	10484805	24897840	23049048	23651438	2625037	2598832	2349755	21630466	20412410	21294618	2547326	2362606	2494765	20909596	17988980	20442608	4399932	4960813	4912624	14825986	12356941	12443063	3320421	3940130	3078212	17992042	17779812	17153032	2474262	2324556
P98137	5	KPYNVESYTPQTQGK	1661988	1395248	1158482	64186	293252	119085	513301	649104	482981	13733	79128	70796	1199348	1156996	841607	283492	182887	117585	3585622	3324296	3202475	285991	142336	149485	3699164	3152509	3002451	357781	420162	240154	1722745	2006058	1361533	842520	551614	428400	2329869	1629483	1131651	206996	286720	191107	1523747	1647718	1140584	264943	228783
		STFNLGFK	15278650	17046968	15361033	15949710	15532912	14815002	8417192	11879470	15954986	9162120	10657673	9475687	21445740	14904176	17277996	3789355	7252917	11053530	24382344	26526686	25822106	10645795	10126629	8850508	28954430	27715036	27649324	11206546	8121142	11585000	27355558	21778984	30119216	19255660	10324270	11017679	21370838	20244254	20769770	8246585	12200645	16276723	23203488	25625694	29691048	9279591	5214539
		SALEVAHYK	10467308	8878985	8590662	10026295	8294206	8619937	6221052	6803603	7148063	3882225	3833215	3726228	10360138	10024954	10304672	5572122	4438682	4669628	17054806	15351359	17410504	5487618	5575973	5883832	17801420	14666071	14258752	6511655	6529808	6512763	13598370	12821457	14688147	9762113	9117274	10846354	11412154	9605435	10491013	5360936	5199495	7111660	13865486	14517439	17679298	4879616	4146530
		ADYSLNDVQACAK	8503907	8814860	9393602	4685350	4057000	5431536	5314302	4851928	4958198	958220	809858	366071	5209658	6311116	4802171	1875009	1525305	1346828	15986112	16468120	17356814	3649635	3964221	4425950	16843856	16615164	16860484	5905492	4871806	5347937	13446108	12376825	14699932	8492242	7721138	7967977	10917275	9443714	11293293	4565593	3203779	5019315	10234207	9489529	11907546	2790395	2391461
		QALEEFQGEVSPCR	12414442	11588888	11300638	7604869	6763077	6494911	7854323	7228959	7546454	3324203	3822864	3172741	7731300	7882952	7111165	3817846	3523190	3431343	23923018	23321856	22317228	5537733	5591281	5501622	23006894	21074100	22319288	7088109	6513096	6359073	15208985	14536215	15989651	10812606	7603945	11569271	10433668	12011216	12144847	5357718	4559949	5313877	15583078	14901109	17111620	3856442	3126646
G1T5S0	12	LVISYEPSTLEVPR	7696736	6320017	6333115	40055992	41416636	42971528	12532910	11780702	11973841	58677912	58283456	56696568	15809511	16147610	17753536	43727316	41088344	43627756	8137451	8390881	6092229	27592910	26400028	28619530	8697714	5657167	5911387	29112516	28384212	29722450	8365574	8986749	9354540	13275469	12291161	15151608	6349557	5609558	6280725	21600154	21333560	25130140	8649422	7633954	8916563	22958130	22847810
		VDDLPGQEVLSK	9764512	9727224	8440244	52438792	52400252	48317824	13665290	12891444	12979072	71908112	73443664	73927056	22517344	19920268	21310048	55240292	52804052	56077016	9324047	5457884	9049600	33244520	34390572	35519940	6710794	6498710	4829842	36651656	40630500	39988264	10595474	9424855	10566429	19145912	17202444	22798966	3205626	4974816	3912210	30233468	28546784	36439988	6019972	8138764	9470439	31465140	29090422
		TGGVAEDIAYILK	4818708	3808877	4689392	24418404	23084974	24559240	7921373	7342624	7370418	34723476	36581428	35842576	12613335	10553642	11161249	21363276	21686404	22853788	4183497	3957306	4007960	10352966	10987039	11544607	3728840	3493362	3934167	12491933	13143376	13152449	5737349	5282627	6109830	5911249	5260178	6022567	3080171	3259106	3316948	11575668	11128999	13561120	4696092	4305258	5023338	13424512	12291717
		AILVGEQTVGGALDLQK	530484	615727	814019	8744693	8109253	8584218	1320050	3027265	3202832	12793820	12135961	12402835	2657024	3281145	3155759	9902130	8823688	9730018	1053287	299821	143184	5546625	6218828	4780836	657390	658085	649606	6226144	6033687	6032401	1152368	2293862	1930363	2942478	3323334	2705412	2220010	796581	361984	4298824	3903234	5146766	1067202	873613	1042718	5152301	5517661
		IGQSDFFLTVPVSR	11897381	9731151	8447806	50463748	44935932	44442944	10622377	10267318	10066175	76426512	76991880	75618184	17841902	26360258	21790554	60516424	55016016	54343204	8367034	5628323	2622908	30729852	31226136	35773164	12226274	11131903	11474202	35652960	38679536	37197440	6850892	5772716	7510725	12886792	12861590	12985745	3863360	3828181	2915388	26940394	29711958	35300700	8607365	4277708	9212401	32019176	31735480
		TPAEQALEK	413217	1006367	698107	20176954	19792276	21493590	3021784	2504588	1654030	21992848	25847768	24117696	2513695	2301092	1480939	23605484	24054724	26036544	931589	620211	746011	9731073	10445420	11028075	793563	887719	1078709	12330891	13056592	13242585	1765713	1343831	1766485	5351809	4892976	6738004	530024	482165	574220	7834025	8943737	13732246	1151113	1575126	2656496	12496830	11583601
		ALAILTLR	3542028	3703610	4170038	20122230	19496324	22776196	5974296	5250939	6231942	24452348	26849854	25630052	7967071	8985444	9636200	22218918	22454602	24408418	3039400	3567123	3504495	14090820	14116867	14103836	2986729	3340749	3242991	14567343	15894846	16182897	4720584	4220524	5276303	7598264	6040752	8398053	2409947	2362159	2701412	14332358	13772686	16810192	4476868	4352658	5269767	16358924	14856927
		LNAGLQSVSEDPR	2420757	2040275	2164943	17207270	17503348	17867714	3694660	3428523	3730179	22212662	22575118	21020610	5823624	5807654	5485739	18974374	17636530	18710904	1059985	1196486	1444834	10925606	11066057	11494357	1000000	1424604	1064274	11424270	11803602	11545489	2793198	2239642	2730286	3419494	3172890	4709045	754665	918526	1336636	8529618	7925148	10399694	1564812	1556394	2435869	11159413	9937287
		FAEASVLEALGPQVLR	3270991	3381370	3209842	16386325	16080879	15830337	4376638	4611256	4117122	21340092	19327462	22145008	5796738	6605183	6540715	17367322	16720010	17015544	1793606	1997344	891271	9787506	8519800	9302317	1389714	1689518	1257437	10383075	9715848	10220569	4142070	3252527	3295124	7664397	5776809	6514248	3069447	2837527	2710422	9307099	9316288	9897914	3644944	3210695	2626836	11603726	10582306
		AQEVLEFHR	3270991	3381370	3209842	16386325	16080879	15830337	4376638	4611256	4117122	21340092	19327462	22145008	5796738	6605183	6540715	17367322	16720010	17015544	1793606	1997344	891271	9787506	8519800	9302317	1389714	1689518	1257437	10383075	9715848	10220569	4142070	3252527	3295124	7664397	5776809	6514248	3069447	2837527	2710422	9307099	9316288	9897914	3644944	3210695	2626836	11603726	10582306
		VPTVLQTAGK	1042714	1923708	1303280	3849170	8100430	9621204	1576596	4263855	607979	11272206	12533663	11702198	1276115	2162694	3033506	8430985	8281025	8317199	1180825	310836	981604	5030158	4910032	5437912	1187801	1223278	1360530	7026992	7233240	7310108	1003208	1067346	1222621	3394222	2165732	1615282	813893	789764	1230529	5101556	4559589	3420657	585995	119441	933664	5522694	5267773
		LVADNYASPELGAQVAAK	2520498	2664864	2795872	25656156	8544033	26314092	4555380	3650189	4159377	34811572	35624208	34380404	8527350	7834336	7770066	26172252	25317520	26331892	2092456	2182958	2598880	17390160	17323424	17321704	2201101	2167821	2218869	18716038	18738700	19518774	3556264	2608097	2798496	7292163	6422174	8062963	548836	757967	1131356	13359757	14170479	15464749	2004428	1975088	1108555	15133486	14413497
G1SS66	11	CSSDLVLTGSAER	13769398	11948546	12907973	17641300	16418689	18205360	9062489	10367437	11040399	6157867	7129766	7225578	9697452	9291135	7720860	7558234	7229272	6563534	15877090	16801370	15073638	7335026	7247720	7407688	12621961	13586023	12002458	9814860	10521430	9784272	10348613	8613003	11154494	7878428	6004199	7022273	9520362	9786845	10527533	4253214	4324485	5786459	9270542	7796368	9551893	4149685	3607248
		ECQSDGVWSGTEPVCR	11824174	11649766	11067585	18454456	17993692	18070990	10677595	10467296	10347888	7334723	7330273	6705176	10153971	9179119	10027530	8726466	8598893	8373212	13109426	13129874	13355784	8330141	8208292	8561966	11773634	11833505	11586512	10797403	10849217	10458460	10803936	10978784	11041892	8021512	7420787	7958543	7881329	7996105	8799494	6644177	6294228	7067783	7647632	6722882	8049563	4723777	4104679
		LGMETTGWQEIR	16211732	15849594	16699137	14251648	13575802	14897780	10170926	10543158	10697410	5193744	6945868	7275724	17132842	16816978	17082164	6655143	5786604	5028584	19507366	17472694	18005028	4704473	2916329	2201431	25586862	22449426	22109766	4406504	4962110	4431011	9709417	10710555	11603237	4656252	5654634	5039524	9637981	9713804	10575048	6217761	6157843	6087545	11561191	10207059	11324171	7109749	6792312
		LDVDWR	3612131	3759217	3948416	3693303	3183734	3952518	2379780	2293075	2175391	1299167	1119925	1135337	3807461	3464638	3581310	1575935	1351109	1339265	3766252	3874651	3901262	1289145	1403757	1352800	4756480	4279125	4723329	1665346	1770883	1775232	3094239	2886695	3312658	2142696	1623001	2289312	2610916	2569592	3581999	1409626	1223678	1614968	2717796	2571303	3197587	863817	780381
		HAFILQDAR	50981944	50832336	49840544	36495024	34801740	37147920	9579902	9235814	9267431	3007544	2105942	2367105	49023052	45255736	47314520	21508328	17527068	14867464	50141756	51470152	50363636	13748227	13585586	11684633	59135196	59875408	59911604	20575990	19677622	18090736	19394416	16576503	6918162	20964814	20775920	27125704	24196070	24271692	26958706	13419243	12542476	18000160	15284866	16268942	18169092	12870006	10993404
		ALQQVFEHMLDVSK	5437058	5266594	5394277	3793908	4106740	4065357	3474343	3196622	3631737	421195	1737888	1621120	4943803	4375897	4485218	1602998	1420229	1568435	6297422	6445105	6067735	1020433	1022607	1131167	7355694	7511929	7535400	1319768	1432454	1420645	4054825	3456550	4194614	895706	732790	834626	3353304	3424828	4334321	1075187	952566	1059169	3370989	3150769	4181400	616606	449148
		TPWHVTFKPR	8237216	8940977	9471126	8353853	9122622	9953044	6694545	6711587	6674585	3010458	2902249	3011218	10177711	10560695	11000909	4829491	3752724	3783058	10271145	11106628	12259812	2517140	2338817	2622289	11206071	11276810	12342514	3440385	3729684	3800242	7258208	6852078	7818391	2588360	2339432	3034320	6536412	6362250	7816133	2834054	2418077	2978900	6403075	5751244	7423823	1860434	1637392
		DHEEELLSQR	29361490	30678486	30439884	26956104	27807958	26205354	21726316	20747062	21772026	11761922	11772183	13671520	23514070	24256140	24447464	13327727	11943305	15387289	33197944	38123296	32850376	12286383	11093318	11169905	27177116	31059756	31250634	14534974	15759607	15847585	22031800	21646840	22103792	18920420	16361204	18356424	23027728	21883578	21527914	9971427	9629615	12687575	18408158	17231232	18396778	7988746	6789408
		NCIQAVSER	16766395	17182094	16633311	13263255	13664456	12948838	9812332	9515313	9696101	4398909	4064083	4561754	12308093	11394747	12582464	5850129	5722170	5620170	16798826	17011068	15713757	4043713	4205866	4584629	18143790	17708984	17045950	6941679	7487288	6594953	11173695	9325378	11737493	11260856	10917336	15042500	12222727	10720940	12996923	3457890	3399929	3985000	10204434	10031355	13234578	3243737	2838692
		DFHINLFR	22612090	21230458	21835932	19611346	19325664	20270004	15550304	14237466	14685638	8448974	6373698	7931176	18127874	17412160	16849506	8374696	7786389	7773199	25001850	23071992	26529586	7678255	7457720	8097358	29444800	28738430	28346682	9589571	9841898	10832256	17975720	18064162	17113542	8622240	8013309	7620587	17454428	16224612	16860246	7042485	7125943	6436775	16334030	15535910	14955395	3917320	3888332
		EHLQGVLNFLPL	25880712	27381680	29081376	11605195	12389451	11218762	16726920	16493743	18052970	7672467	7712022	8299883	24969064	25526812	27184820	2936421	2672812	2634796	28645308	30912366	31509340	9308623	8004560	9151066	38712440	40026244	40973868	4483869	4964951	5051656	23456280	21981162	23456874	6335107	5549555	6383345	23522106	23772350	25463922	4068549	3982123	3956807	21587778	21923450	22896334	2203965	2172430
G1T7H9	8	GQESALDIQAPEGFAVR	29808874	30678662	30586976	19128692	18950724	19160110	21009626	21025420	19413638	8014862	8350989	7888134	25097718	23522966	22371156	8656310	8292889	8223148	28407736	16253035	27063658	6079944	6446112	5892430	31953536	30279324	29239194	6870663	7265586	7338334	30206062	30511606	32149056	12027861	11597074	12517124	24922408	26561612	29572560	6444726	6716677	7232571	23716176	22717270	25562438	4929435	4872701
		LCGQQGSPLGSCPSPR	56220740	56772724	54878824	33439420	33506426	33210832	37162160	36147796	36920904	14304014	14964790	14227109	31202368	30271040	31184328	13918044	14402556	14161465	50253704	50889036	51098804	9935050	10117875	10257106	51822200	51509028	50052696	11983454	12032852	12130715	47602448	46228968	52077236	23614738	22170472	25897340	43800476	42713916	45702828	11682455	11835258	12995373	38160204	37734748	41213184	8557680	7534846
		LHYTTEIIK	4739441	3917748	4645108	3670605	3819032	3777397	6125699	6372678	5776566	1021317	830883	1073062	8449664	7789392	8583173	1975544	2144959	2149500	6066734	6020484	5878605	1621263	1110431	1376004	4770604	4181728	4816485	1421792	1217631	1357796	5526469	5253239	5286283	1203922	1042414	1102967	6427368	5212865	5667329	1440236	1573834	1633160	4510188	4428266	4771611	923206	784507
		DYFIVSCK	10161283	12655075	9245518	11281629	11116009	10640857	9308024	13503417	13023790	6639606	5418662	5504510	17172692	12927373	11466036	5557873	5758206	5605960	13911819	14629710	13221968	4785159	4581941	4582296	10554787	10662295	10475021	5089076	6399948	5973155	4516245	3818799	11676777	4672174	4802296	4955353	9169968	8374456	11360307	4276227	4059896	4488479	6917509	9620875	6091842	3190945	3044309
		EGYQLVEGNK	5456234	5678052	5557350	6081461	6018724	6087686	7622775	7231225	7564335	3218382	3280156	2846715	11842346	11595003	12383074	3154996	3232619	3068297	6911799	7250870	6881459	2666184	2556128	2665520	5058813	4892700	5549251	3013794	2792911	2832032	6122807	5600064	6484389	2927308	2950753	3636800	6527503	5411888	6710655	2283288	2239503	2637136	5651615	5521662	6671798	1571941	1758873
		LGNFPWQALTSIHGR	10927010	11036541	12176962	8921110	8980792	9882544	13821288	12583189	14652712	3156378	3239985	3365041	23191764	22723398	24827956	6094910	6221343	5893950	9821358	10943649	13604338	1750497	1909175	1933686	8762112	8298923	10258191	2026501	2021705	2228999	11056513	9626869	11848094	2638966	2279516	2475443	8825555	8535828	10313244	2378950	2570378	3069447	10223515	10171551	12245554	1741634	1735468
		GGGALLGDR	21909486	22647758	22050270	18716040	19887368	21295330	20427914	21688916	22106372	1612676	1580764	3814734	28440674	30673774	29932904	5991361	7960709	4057497	23962268	24829772	23209752	4440056	5123548	4877228	19696452	18308300	21157204	2689333	6269603	4068235	22660830	19629542	26050384	7804052	8370676	9272538	27760096	19187896	26311546	4508864	5630377	7553346	17682054	19726974	29085936	2937428	4390341
		LLNYVDWIK	3436411	3382537	3374790	1305198	1231279	1241343	3161994	2631101	2964696	118519	1215935	133075	4395456	4541863	4543831	350338	351580	596391	4605051	4938651	4940585	160809	44165	72939	4379433	4293515	4624400	113327	255874	109866	2710901	2680303	2789987	211905	107406	314017	3159898	3345247	3759021	182938	83826	138157	2982903	2807345	3321178	54369	62104
Q28679	2	YGATGVPGR	12622712	11527387	13177468	12267972	13206886	13934438	9931486	9855437	9688643	6306546	7284604	6566111	17974128	17890086	11529303	6772566	7087819	6911247	22410276	21279034	20971976	8440775	9769031	9513656	20946206	21824916	22192970	11706728	12459661	12492284	19313572	18282000	23585158	14472954	13586274	19546670	17802648	15896449	19701310	8359042	8233562	10598630	18478252	17512784	24767842	7047072	6641939
		SLPVSDSVLGAFEQR	13256520	13203332	11164612	9583742	7066909	8326188	8906787	7906465	7714077	3994431	2946069	1886492	10243309	12637232	13453427	4480601	3194667	3520720	22810114	24543130	24973960	5538605	6209386	5155739	25973216	24048538	24622680	7516021	7095097	9032480	18389146	15518326	18990342	10761665	9975486	12670197	13755599	12837769	13847968	5787155	5550728	6303789	16557913	17439616	17476738	4152830	3590611
G1SPF9	18	YGVWTIK	11429150	10993097	9373756	9014470	8972002	9483489	12449410	12201613	13238899	6542414	6223851	6180178	12672467	12590572	13551173	5103925	4531346	5050436	15469884	14916738	16644598	5268499	5487748	5254125	12143403	13450233	13577087	4817242	4333021	3563599	18129678	15227570	19277926	11237699	8080805	10062414	17535816	16852512	19307906	6804497	6258480	8106993	14304852	12374986	15331526	4281772	3883725
		NFEITIK	3509716	3907995	3331021	3340685	4016230	3430729	4249150	4441702	4096664	2993275	3271529	2933624	4885592	5120859	5003194	2337629	2290268	2260903	6300393	5741346	5546480	2749289	2898990	2886792	4815880	4798348	4866255	2221199	2579236	2466944	6870046	6071555	5904107	4773663	4550287	5314618	5745500	6003865	6743682	2637758	3205491	3971192	4120357	3746606	4660127	1901068	1848011
		ELSYYSLEDLNNK	18617954	18705144	20977226	15825006	14865824	14561722	26017278	26203918	25616348	12246091	12036450	11179529	27737678	24598086	28278168	18089938	7683145	7749118	28236868	26832038	28253254	10670049	10365420	9976129	24381336	22948876	21017788	9324535	9003308	8817770	30778074	29931892	33036350	27640232	22804694	32396584	34460656	32113156	41725724	12254659	12221311	14898049	22350984	23137064	26301834	10051772	7755702
		YVLSPYK	17373174	16986740	17919396	16697250	17503176	18765374	21200312	19075926	21669360	13687518	13574634	13858096	16575886	20098860	19453222	10665146	9947310	10022796	27004468	30183588	29563454	11204109	11269344	12065547	24283186	22851648	20187096	8854469	9547964	9727898	28000980	25385194	30564658	15256354	14156698	15062024	28088602	27326100	31485850	13547686	12703041	14762134	21811600	20771272	24160216	8776567	8478273
		ITHYNYLVLSK	7442680	7493503	7577061	5576278	6286978	6501844	9170045	9153782	9658648	3490279	3929972	3905311	7239543	7437960	7472479	3124696	2908343	2955045	9628098	11157252	10876629	3623434	3928874	4165533	7082268	7646260	8384557	2619039	3040916	3156015	10016473	8528025	11710388	3762746	2856197	1892676	9651251	11391372	14169400	3523081	3400158	4597652	6941958	7517935	9016418	2117850	1952635
		IVHFGTR	12285945	13793615	16721568	16111999	15157353	8440664	16747735	14115334	17566238	6441947	7169950	8382547	14372834	17003918	13811389	5281638	7474412	5968505	16031458	16923940	18813020	5961409	7838365	7940429	14575428	15813835	14053120	4706235	4368057	5130680	19416748	21740480	22271594	11507169	10247153	12226504	26902274	12763032	26693002	3505401	3996665	9928372	5796083	18630026	22583110	6232538	5451998
		VFQALEK	11154104	10635424	11522768	9756571	9684984	9879314	10778270	11357779	12069783	6765078	7508823	6855622	12821835	12704705	13740205	5659475	5407432	5808425	12294455	13573004	13407433	4775243	5543917	6098799	10471130	10983992	11596907	4836191	5285648	5406937	18331504	16146737	20234508	10527590	9563870	14340782	21406216	17220918	23777042	7451133	7631181	9747540	13821772	13045234	19522324	5723642	5212348
		TLLPVSKPEIR	39260844	40313732	36531812	32372306	31968868	29968424	44868492	50442528	44025972	21486614	18599012	19287810	50892588	47945048	45602864	13579488	16246677	14735887	58743096	58251160	62457728	19041254	17238332	15931668	45329680	41432252	38767256	14683228	15036398	12961638	68122560	72493560	60194296	32622998	31209202	24806514	74550624	74345304	69050200	22827102	24100284	19284968	49010452	49287692	41883152	14183030	14967721
		GIYGVVSR	24884966	27960326	36097480	28176396	22065880	28657196	36346668	35993920	42553292	14701732	14004879	11626027	30637368	36095572	30824564	13765026	6812852	13366421	40919176	40175640	48596160	11704764	8542765	16072240	30786642	35048728	35402320	12709683	6292714	13168511	48192408	42485420	55489060	16309125	17947284	29920558	53441560	41964820	57509136	8884393	5770987	20322702	34396716	36232748	47941188	6624625	9086397
		IPLDLVPK	28442304	30677848	32226600	25850768	26684040	29640020	33629264	32418748	33374972	18188254	20514168	18430700	32502488	32216540	34240088	13566848	12901256	13525381	43198440	46979352	46337192	15922624	16959520	17490714	30021228	32505508	32373072	12730282	13372768	13447527	41666672	38457616	48290512	20738024	19143884	26248048	45062888	43045056	54583864	16177878	16514541	22672664	32504078	34710708	46175132	11299643	10044851
		EGIVSIMSYR	27251680	29912450	30731628	11545144	11107085	12033552	24632754	22513284	24079948	7276446	7464261	6309088	18899244	16182907	16458268	5936862	5201718	5814301	37729540	40268612	41240968	5195748	4916223	4649063	34459784	34769240	33493836	4352777	3710623	4235842	27639908	26886674	29760416	8345289	4970407	6230945	32220754	34104900	38374848	7058862	5957835	6728106	28102408	26201592	30438690	4531326	4660018
		LQGTLPVEAK	44656384	45248616	44763672	46777120	47477176	47248936	53386940	53180528	55487404	33325276	36002580	33561852	52600524	53947276	53888168	23990458	22125510	24349654	62410768	65995360	70134016	25896078	25946764	28713464	47762884	48855188	50115524	21437468	22933828	22878400	60986448	56108336	68738320	36610336	34182524	45305668	68439048	58148128	71174040	25435904	26156340	35360304	46754484	44967424	63883920	17773522	16918792
		AFDLCPLLK	25460218	26942380	26996840	14137898	13470262	17009528	23321796	22572264	23244220	13640292	13820534	13530746	19857332	19893658	21641020	9459114	8461053	8748259	33146058	33556520	33687008	12319912	11972306	11609338	30663116	31593912	32961912	9492177	9308226	10090777	31785490	30966736	33810040	13157894	13071038	15084800	32339692	34185572	39263280	13089626	13651040	16512423	25897004	23369964	30221882	9669464	9968157
		GGSPPIYR	22087108	23798366	23639382	23572560	24899226	26522688	29981190	29102208	30874068	17377864	20971276	19387300	25876902	28346816	22046688	11366454	11683652	12922754	30696746	32554614	32629054	13089794	13351166	14161419	20958756	21737598	23095780	10980697	11355337	10993391	34605544	31536864	41017596	17455274	18361862	25315610	41186440	28625206	44665944	11085194	12219772	18642260	21433028	26160546	38474856	9255515	10323411
		QCTMFYSTSNTK	5799795	6067389	5211907	3490446	2899659	3433673	6924449	6533365	6642971	1445462	1777857	2004322	1318377	1375738	2075387	1007860	435029	799948	7574247	7996037	7814688	506216	808695	742528	3890925	4083877	4012513	385818	228030	374222	9064260	8297006	9110638	613755	686682	1064667	9496234	8473891	10803821	1702387	1157137	1775793	8097313	6380289	8745898	635364	654451
		CVEADCGQMEK	5573599	5714576	5900738	5131193	5148867	5263376	7046203	6488706	7029984	3098606	3078887	3324382	4223170	3661244	3154208	1800538	1677510	1511807	9085994	8550493	9307477	1918311	1806684	1601925	4800215	4950191	4737749	1674384	1662181	1891820	8135502	7489983	9080413	1765628	1819143	1676118	8335398	8957048	9500608	2691144	2872392	3410368	9426116	8241738	10576391	2111060	1471873
		YTATLLDVYK	17373174	16986740	17919396	16697250	17503176	18765374	21200312	19075926	21669360	13687518	13574634	13858096	16575886	20098860	19453222	10665146	9947310	10022796	27004468	30183588	29563454	11204109	11269344	12065547	24283186	22851648	20187096	8854469	9547964	9727898	28000980	25385194	30564658	15256354	14156698	15062024	28088602	27326100	31485850	13547686	12703041	14762134	21811600	20771272	24160216	8776567	8478273
		TTCANADLLK	15750262	16390097	15372318	15558966	16202693	15980698	20945472	20003704	21478198	11436901	11827012	11681100	13368210	13509493	14034211	8357912	8011905	8489865	22759222	23544656	23899344	8747848	9139588	9550256	15397206	16125282	16577712	7853991	8400652	8290484	25324558	22757368	26898580	14365406	14536766	17295184	29901418	24270962	30168960	10457902	10102636	12407493	19392688	18508896	23298290	7349037	6914821
G1TD60	2	AALGYNILTQEEAQSVYDAR	84125040	93459448	100320944	22870712	29370426	28327552	79470968	82246560	83039936	17596058	22550470	21751680	146415488	151678272	157148912	32557878	34010772	38708544	80309360	96230144	114707208	11835967	11794949	13028112	109281816	126545472	126846328	8577423	10035730	11763946	62137480	72586008	81514056	19429808	17969836	20964822	37105884	43577872	52548304	11449769	11131979	13244508	84329144	83371632	103940464	6366024	4330083
		YDPVCER	13348291	13701025	14047966	9499343	9880737	10052054	6521359	9421558	9662266	4168861	4628511	4518326	10327439	10062718	7344618	4832501	4615633	4609806	23306414	21043162	21219608	5160033	5879114	6620210	20012258	19778290	20891422	7098125	7696153	7385698	16982322	17598962	21695994	2618305	8093952	11065980	17973630	13231732	18838108	3997732	5658894	8986516	14889186	16675648	17543226	5452800	4180562
G1T3X1	8	SDPLQPIDCR	93419672	101515976	104135520	40202716	39507244	41530808	106898664	109004712	114759536	33806128	40102884	35811924	13754929	77641240	77045224	31254894	30981220	31275358	127520768	131716712	137179872	13199488	14183618	13621811	128734216	128928512	136405904	16535313	17288084	17375938	64079280	52985464	61462900	48355988	41990552	55061480	59837092	51300728	61853792	14433413	12534792	18528846	65251844	47984564	79200896	11098401	8009789
		SIEVFGQFHGK	62042304	61785936	59021556	23016682	22545530	23784630	69118416	69483024	60307544	24327304	23879876	25153696	78572536	78968864	76030616	23190764	22532232	23398166	83992608	83887488	68730560	8280627	7279621	7917233	94661888	87552192	93553656	9793055	9458838	9956196	81596256	79476832	79265512	37979304	25247260	33495112	71920288	76915296	67670016	25135990	20000560	20919080	79225264	87978992	76222808	17107894	14282226
		SCVDALGDR	23093328	23056008	22414598	8665359	8809258	8943554	21616816	21390930	21097716	8488790	7908556	7279656	20030384	16890032	21204780	6590207	7242671	6341022	29282890	30228632	29650560	3075469	3119564	939401	31535652	31427244	32092580	3922539	4021802	3729439	20590308	21053754	25109808	18067594	17092280	22294460	26959944	23924220	27399178	10672947	10416914	12393187	27973716	29593248	36230420	5499452	5214671
		EVQESELAR	43325912	46613048	45980076	16539497	16768147	16979156	45582136	41463148	42837764	13235305	14466503	13463461	46692816	52795488	43622272	13286407	12459660	12895308	57876516	54967932	56661332	4857984	5344441	5059566	55396432	55387580	56652368	7814469	8117549	8261303	44270840	40487004	42966360	36429576	32554440	44417576	59153544	43044508	57213228	11305110	11029269	13622164	57440496	55566096	74433792	9553796	9014025
		VWDGNTLTHYR	19509428	20528284	18161982	7878047	6045449	6918914	20634428	21966876	20939418	4496988	1911382	3929619	21817122	20174862	19360112	4686910	5132369	4224261	28786918	26992444	28540578	723791	635150	1183028	31145826	26798902	29919078	932795	1207247	1568632	26470122	26243584	20328958	12990563	11101007	8954279	25961380	23340080	20054854	5380784	12263150	4583054	26512010	25150316	22337152	3293621	2590735
		YELIYVLDK	60107424	60751472	64450888	23930434	22562042	21663158	67127936	62277768	65094940	29032666	27721218	23883102	69960872	69998608	71938984	22683846	20389886	19328416	86253792	82747736	85740176	11569853	12704958	11412414	101017232	100582552	101894592	12801555	12009786	13218850	69632184	66005236	76697632	36716680	34665344	39690304	65289992	68751032	78844792	19462592	21243126	25199532	80415176	74970592	91053632	18573504	17736362
		SAGLSLTGQANK	73725368	76742896	72352736	38074248	38985328	36622740	93006832	88011160	87523072	35587388	34872728	33049788	91238936	88290128	86438672	32874058	29339714	30239896	100734936	101090992	100886080	14444505	14882882	14176311	102291768	99503504	96006408	18036036	18733084	17648538	90441632	90060000	101273072	64949448	60053940	78710248	100431176	85131080	99210320	29386676	29519668	35662236	100285176	98653096	124273056	22699552	21379396
		LSPIYNLIPVK	122177088	127382256	135280768	43366372	44281060	48973540	130478160	119619488	134855152	43044972	44960796	45352696	134099856	132008384	139858576	35790816	35089236	37800376	170859792	171154112	174292368	12589832	13284221	13086872	195681520	195670656	206431680	17838138	15876112	18135818	146473264	137013600	152686608	64789960	65581320	71805016	130142064	131604040	159303616	35529272	35172924	44395676	137601872	143959344	172754256	25961196	24469418
G1U6T0	7	WIISSFIPK	4829878	4880089	4975380	2055421	2166733	2135181	3266156	3148804	3419887	242840	420874	266488	4035608	3881722	4170845	1070375	1151750	820129	3406333	3616816	2840698	77562	71406	0	5372366	5793442	5943195	113721	95471	24398	5502412	4881976	5766987	1213744	1830595	1126809	5356188	5061716	5976125	486954	482283	586295	5169696	4789104	5884267	292902	282296
		SFRPLTGETDTR	2213527	2116588	2030579	868107	629096	522849	1311063	1714599	1521949	140855	243743	104518	1057876	1263869	639816	144174	156168	120007	705819	408095	566719	70010	34489	11254	1961275	2167373	2076363	55057	74616	50051	2759566	2034581	2841385	470356	301475	430927	2270555	2386071	3057422	75677	182712	193531	2440686	2035272	2980876	135592	102377
		NPDSIAAWYLLR	12017655	11274975	12130180	2514029	1681238	1279782	8174720	6953515	7741932	315024	156446	339776	6589162	5797910	6052575	985335	940479	392285	8011134	8197735	7920921	148719	66163	250480	12897515	11747553	11948942	181620	146994	220165	11098388	10194260	11840863	2373462	1061396	1946068	11336541	11081365	12831514	804786	253749	444365	13360542	12375977	14493280	237023	124892
		AEVDDVIQVR	20036872	19568794	17978248	14683284	15015980	13969901	17312194	17416356	16117686	4526963	4408808	3971891	24025172	21913808	24476572	9569212	8373036	9353690	11594534	11966532	11292403	2541955	2334763	2138663	17556818	16194324	16548875	3081029	3651874	3232641	21653492	20483536	23864330	8208684	8019628	9989327	19712340	19422488	23881734	4847266	4987227	6113397	19423344	20173456	25957364	2780912	2765391
		ASEYLGYWEPR	17612466	22527804	24975008	12470632	11449588	11872957	18953554	22715784	23544828	1320889	3407249	2355318	22678214	23604518	23049748	7594333	7574705	6528653	18899654	16831582	18434638	662123	424166	627181	42660448	37237644	35852788	375917	659026	13139234	25184634	29241130	31022356	11423896	10077270	9251480	28974316	34528512	31479674	2704532	2859721	3948147	25336776	25693536	31848908	1419693	540588
		ENLFDPPIVAR	26220896	23201176	24357484	7674266	9995894	10409927	22383318	16622352	18635492	2936459	2207398	2651703	18409498	15764470	15876163	7368462	7222514	8607157	12632926	11169282	13263110	1193642	924629	659620	24776246	20105422	20014232	1552436	1858704	1316760	29737702	22657104	25907082	11215096	8005276	5522580	27615692	23542500	28215464	3509830	3819247	4064912	25447428	24708812	30652240	1709604	1959674
		NFFNPPIISR	27595976	32594004	28763874	15698286	13613846	16036634	27137246	13922317	17870654	109577	9831055	8027888	43951664	39142508	29759000	10919358	9209076	9837201	25985524	4618244	18520404	1563766	2579329	2358740	37905324	38911204	27088822	1240247	4182328	4730291	32633296	32612516	36472264	6174915	5514450	6065712	28946158	34165512	40758548	3128319	1873881	2663062	29175122	30698124	39039996	2283111	2185795
G1T6Q0	3	VTNDVCSQPLR	1587688	973119	2810240	5170898	5595232	5681317	1271509	1057763	1484677	4793061	4423393	4209982	1282737	988918	1527181	5074386	5019578	4165484	1274056	1131759	1319082	3586435	3734915	4179493	1190233	746698	702083	4377528	4641740	4755985	1077273	841317	913742	1704298	812832	1872442	795785	963171	1166639	4157591	4251628	4938790	1009145	681601	840598	3770843	3404253
		FPNAASQPGDR	362226	488309	139261	2243435	2314370	2127114	746595	226796	0	2844447	2700372	1898444	787736	1101134	1188230	3140492	3219142	3538289	113671	111904	350047	3185215	3150178	2717289	0	1137979	299094	3357450	3026969	3031728	151448	95006	57736	2769219	1974516	3623891	177781	637059	305556	3347563	2556075	3737063	53982	47787	78998	2521258	2170707
		TPVLEAPLQPSELQPR	4459858	4777103	4018690	9414078	9612689	9886086	3696620	3304792	4081069	7531738	7815973	7496196	5958110	4954454	5967600	8579205	8643102	8469198	3528100	3615317	3450014	8236310	8527231	8362327	2517049	2769124	2714782	8923032	9127084	9217984	1945558	2083695	2700956	5515681	5509568	6584959	1107126	1952833	2277338	8402401	8134128	8902483	2081618	1820971	898097	7710022	7263309
G1SGF8	4	QIVADQYYWENSCDR	5111588	4777441	4957398	2280649	1925014	2168534	4869108	4924440	4810179	1598100	1580160	1606773	4818691	4574803	4431462	1978765	1739465	1586518	6015880	6085990	6151299	712637	411400	714373	6330826	6306100	6623019	643473	777138	628645	5389041	4928263	4817846	2417503	1906591	1802471	4669961	4582857	4999305	882247	512189	915262	4499062	4324590	4445713	361767	277921
		GEVLDNSFTGGICK	8631971	8586434	7674901	4523999	5174143	5186283	8505916	7876341	7038314	3218865	3488077	3544912	7726121	7513979	7117695	3544985	3906884	4496523	7820072	8131654	9473505	2506195	2484605	2283255	9390096	10051843	8758992	2542364	2766377	2405243	8341747	9558423	9726315	5160450	4536863	3924141	7758136	7969643	9263953	2774061	3121253	3660782	6184813	7711187	7917220	2381026	1659369
		DLQLSDVFLK	8537878	7753074	8335915	2684223	2797857	2982815	5600262	4421407	5272151	659334	538397	901994	7782789	6605751	9451057	1334525	1523291	1553379	8940442	8525101	5126730	86477	246057	492539	10548820	10063763	8760015	532992	530096	1370201	8316829	8482149	8642666	3760960	3379871	3947400	9514944	7367015	11672674	1286288	1042455	1591481	6919130	7915578	9774610	604347	481718
		AVGYQYHR	3021617	4123845	4533066	3645006	2826902	3993225	4677561	4140434	5730039	1765880	3173459	3890949	3098343	7208033	6046617	1617791	3138244	3549693	3939751	3101590	4108778	1669608	2206976	1687245	3193517	4762415	4739911	1184031	738879	1580476	4948574	7098526	7259936	2635328	4319768	4543389	6621050	1180592	6992180	321534	689944	2370402	663606	6160154	6351921	1866976	2170660
G1T7G7	2	NAQMLTAER	1686443	1274539	1512231	2544243	2187139	2419972	2963653	3167427	3296574	672436	240002	261370	5369040	4859380	4958312	1277754	959120	1071758	3309835	2899690	2652088	538663	531319	595908	1608720	1509719	1664704	646507	766922	619944	3081366	2478031	3280896	641978	261199	673587	3561309	2469534	3319440	848774	837930	744431	2763677	2720825	3499646	480984	559815
		VIIHPGWEPR	1604076	8068867	6796485	8839534	9257352	10164049	16702382	18498824	15109848	2009608	2199511	1706991	39137560	19222508	19522422	4603063	5154622	4883708	29309142	23791820	27516512	2885071	1645908	1164506	7459901	8777275	21108274	1051152	1214177	888950	17148490	17469808	16342200	3534226	3618839	1168693	14684163	13862334	13380400	4127324	2163727	1715714	14288665	8456990	12631471	2129236	1724558
G1SNK8	3	IELYQILK	101573	237568	181705	3840897	4105162	4212157	181811	16374	70277	175313	1147701	1147445	45272	31286	118372	2591395	2899865	3107494	342623	446920	38899	1517267	2275477	2785879	234558	226655	165916	1811023	2438011	2366206	2106	19025	372597	79569	110103	190126	42093	271966	0	484749	674546	803948	0	132933	0	922745	1738700
		FAGIDGTSTYTSGDQK	48241	7379	0	794405	779472	957375	64401	126216	30594	814219	863275	906932	95558	34007	12325	1073106	1287179	1077065	0	87055	0	645174	1090993	1045968	0	0	0	952914	485781	588093	11393	35227	0	142860	37193	159429	4890	6366	0	1286848	1602290	1357424	61898	10960	270956	1308055	752398
		ALDAAYCFR	204992	107940	954513	5844025	5905313	6342360	302643	42543	14170	5217429	5465506	5981223	494261	808316	491734	6220276	5391325	5461776	246028	164780	300092	4577937	4990690	4870352	0	299643	643	4330037	4980967	4634723	0	71573	25052	1954725	1503548	2441460	23957	86277	0	4707671	4833796	6068417	180049	116761	229213	4915720	4723361
G1TB36	6	YTACEPVR	71299536	78934904	76871400	61738008	65983480	64587184	96884024	96153216	95664376	62730652	67110472	62911840	97251032	100975176	81846368	44967012	43676144	48606492	59165280	63087896	60712124	22207102	23291450	20727696	47466900	48857876	49109948	23266780	29507128	26664820	97492272	86457800	97728816	51929260	49500196	72385584	101711088	78104120	105524568	42588736	42675460	53072312	84216864	77567472	112619528	34381664	31329362
		GQVSVTQSGIECQLWR	50596192	49524140	50604072	29993278	33458288	33427586	51020660	48871808	50922776	35702464	34880080	31448898	58480092	53793200	49168052	22378000	20571148	20690918	42848616	42259328	41132540	15912971	13784272	14578294	38348872	37337776	35841200	13824838	13494648	6249080	61947284	59480436	58769720	29945056	24329816	25520846	53577272	51993476	58547312	25254784	23276766	25359448	54161716	48471364	51879328	18361008	18779056
		NPDGSTTGPWCYTR	45966920	47877340	47513252	32842636	32939356	33758020	52251532	53403988	55918644	40248708	38080208	38521964	40995660	38594880	41956804	20809830	21673128	20804426	33253810	35232152	35876792	14913593	15478033	16518742	28428942	27493862	28493074	14817261	15011224	14686708	53585516	53266588	58041168	36437168	29855104	36359444	45677756	47480984	54454928	26193998	23090558	28638482	46552616	41682320	51381284	20772816	18652890
		EEELLESYIHGR	14335314	15333416	15469281	1785352	2593304	1980873	6741368	6859153	7173364	2585868	2038921	2393672	22366222	23869098	22243504	2639016	2824534	2560178	7423223	8165188	8509034	1104630	2138618	660625	17492626	17332288	17531420	2315615	2231811	2301474	7828375	6705913	8633087	12936986	12841669	14867944	11365258	11348290	13112948	2396246	2558350	2108333	5310366	5156688	3063460	1220023	1374780
		DAQIGSAPWQVMIFR	55021040	50087116	55363384	11531182	6732094	5184320	51253108	47977188	56050432	13293596	12695320	13741048	70540144	61758016	68542088	6600826	6102163	6121180	41475312	40682444	41870420	3184849	1609390	1702454	54630892	51420340	52743732	3768333	2992859	2360399	61938728	55556716	61611444	11949572	6795408	8284655	57074476	60989584	66669004	11553624	7558550	9637657	65960840	53467196	55936768	7003757	6552587
		SPQELLCGASLISDR	80672856	84032584	82138384	29656986	28068956	29649650	75862984	75336216	74843536	25064922	26165826	24519490	60469044	61064636	62221088	18436664	17271304	17257062	55290996	58561588	58146080	9538392	10797544	10459991	74485504	71744224	72963736	9021756	10360639	9737703	76744208	74048880	86180120	12602009	11400846	13381152	78844624	83482232	90371768	14526766	14582547	16474483	61476412	62968912	70666696	16236527	16671395
U3KMB5	1	DQPRPAFSAVR	5388271	4200882	4260477	8874966	8689162	8383738	8639963	7943899	8138637	3164856	2736273	2918828	13435036	11573157	11414463	6010703	5726497	4692351	4377247	3492189	2418218	3284356	2559767	2635110	3028522	2707382	3448550	4240088	3498626	3643298	10492505	10874166	10588704	3330373	3487261	2473625	9781289	7887783	7387387	2730102	2371092	2009362	5024354	4966544	5257911	2305928	1729373
G1T0W8	16	EELPSLRPAPPPISGGGYR	18305080	18122508	12197994	3314613	3092253	2187281	7848693	8737963	7441428	686624	1103446	724009	18311840	12358378	11228450	2529905	2252318	1613218	19262094	17156488	11886605	1463964	1244890	807977	22280842	20001026	19587992	1126535	1027866	971325	51573940	48500184	38174572	12582936	11196541	8614225	31509266	31522110	23900004	8654933	5260910	3599757	55145980	52208772	36536468	5046572	4466024
		IPDAGGCLHADEER	29573770	28926184	29364734	9868206	10457192	9981355	23460654	25148514	23090434	6924966	6823213	7067760	33452142	34283040	33102958	11810086	12143183	10950053	35123308	33505046	35545188	3591415	3643822	4586176	44024764	41233416	41751028	5054620	5191898	4672024	32045996	29731138	27843920	11440695	10233856	10719147	21384306	17362444	14488424	5828923	5274332	5451802	45042388	42505448	37287932	5422521	5000800
		GVLCPTGCLLQEDLLR	695122176	697063296	705129152	243883664	237021856	246694192	667492480	647273408	662251648	134501728	141727360	138047088	662295936	641276096	656090240	220901056	222594080	229828720	858890944	861019392	880105088	84918056	81798000	88373424	937334464	951951488	984466048	74728552	78579208	82784456	703476608	655902784	728972032	132860656	118968880	143619872	370474880	360535008	407304608	69445424	68883800	86076064	743704064	733903616	847600896	78704160	70676120
		DNENAINEYSLELEK	607730816	613504128	614351744	239727200	226400704	230716912	516411776	507202912	527333760	131909000	132352016	128660640	961640448	934595968	910485440	263028096	238778304	238541904	669682816	698754944	669641024	90440352	88278256	88781584	751026112	733018880	735054720	85168736	87328912	85218984	574604992	599829952	629543296	175999824	165885376	171992720	330747456	323555968	330733056	84955784	90806736	99999488	615194496	619084288	665978304	84094944	73472792
		IYIDETVNSNIPTNLR	63969860	80315800	78476320	27445424	30252774	28514740	29422800	35080076	40153432	24294944	31771080	31077736	403043488	401730976	391499200	24620612	24370790	20705130	94377184	120398960	109528336	43902836	40747908	43638096	131811280	133448384	154341360	10500942	12846757	13999738	337582528	344920032	355091936	41566220	41238820	46312604	179950368	202304000	211018448	25670686	31025088	36091004	357890016	370052512	434633632	18202286	13477480
		SILETLR	813789440	862273856	803734272	225507136	232233856	240733728	613641600	604418432	631995904	190920624	197915040	176176048	981917312	1018053440	995971328	228597728	204077568	209817472	897921792	929229760	877718464	112037664	114224920	116389840	985252608	1057998848	1057115904	91625424	94740840	97696512	720749952	673368384	799632128	232496512	210249120	299010336	389823936	387882368	516437760	111156008	112963968	151271280	740070848	744579520	1014572352	64140328	59848656
		ECEEIIR	632840384	659815872	664284224	330421376	345132864	346182784	674217600	657744768	709007488	169494960	174827328	34083980	756224832	787041792	800187008	341560160	326217472	331295744	745235200	780291840	786184448	93542824	97190496	97472360	668544192	676546944	683790144	103554856	114727056	112600544	710520512	682335552	853845120	269755520	241510768	318848448	469078272	395942176	478242432	116176520	110675656	131346960	869530688	846879872	1119080832	106609720	100747992
		QDGSVDFGR	603923712	603213696	585921280	318212960	309442912	312437024	586271744	554770880	582650624	169038944	168040752	155880192	1044115328	1035156672	1033137344	313480288	283113408	288575904	718802688	736917568	710879232	86379248	89492576	89089032	652698880	643361216	644556864	104951104	111352480	101641288	616303744	527983616	635751744	236854960	206862208	270196704	384918112	307900160	352973056	117724848	108924480	122076256	819992960	728261568	949034112	105204592	97510160
		EGFGNIAR	971116480	1031718912	1035329920	433382976	465408672	473803904	920250880	945413376	960758784	220262544	252372096	211026064	1300424576	1355652864	1398827776	425073440	423980000	457134336	1209277952	1290336640	1025346176	129621728	136226976	144472448	1231105664	1242951168	1286581888	140848048	146046176	153498064	1000469376	899066496	1101742848	283950208	243508848	358865152	697415104	552142976	669627584	128468040	139914720	188975472	1134689280	1143105792	1517454592	151563088	115693384
		YCGLPGEYWLGNDK	959597184	936127616	982695168	352255200	327892736	334683200	846738688	801672320	829999104	197715136	180906144	167335232	988769408	956738880	964762752	372331776	342010880	342732160	1093063424	1070141696	1083423872	125477552	113326680	118151944	1368378752	1309512960	1307801600	114129192	112225944	117044928	1002194880	981278784	1040078144	230057120	194127760	208926672	477311904	530078144	570951488	135700960	129334864	107216880	1026329024	919062976	992430464	110464312	105870872
		AHYGGFTLQNEANK	361609536	337781312	332312992	126964704	125285000	126183104	317113632	331569920	302639360	65552740	59288352	60380824	488909408	462482496	484671936	138666304	129932232	122527344	425024032	410261696	389215040	42581256	37143096	39575924	434323744	390799552	388850112	41306604	38852440	36793476	394969088	406068672	327740576	99172440	91881896	73768160	249640352	207003840	186009120	52999848	51030380	46080648	443816256	401354464	357697312	52461308	47630472
		YQISVNK	291626336	308184672	309325280	159258576	175953616	172171424	305195456	306149792	312986592	81351824	88254792	82336248	480666880	509423168	532509632	164162432	166831696	168138624	340472320	346047424	354105536	46650272	47662320	47939668	330515136	347332320	357803712	53784284	54170100	55490508	344169056	309666976	396700352	119124024	111522952	150602192	235821680	188776224	223336736	56436560	58098808	75960632	395111104	390259264	500370176	59197812	54706004
		DNDGWLTADPR	242973184	237198048	235737440	29433668	30856996	29622108	104074560	97600688	99324832	10966519	13052462	10874011	218250592	212295296	213520288	37351428	33570068	33907368	224074096	235907168	227310224	7872332	8123260	8265943	362340160	320590688	312345952	13409360	12581327	13194819	117348496	105085200	119234760	66127672	54738772	66263368	87875248	90511816	98709224	11021681	10625386	13150496	141100128	146917152	157240704	8052769	7511034
		EDGGGWWYNR	1057323584	1084018432	1050546112	471613824	467688864	477727104	966544064	944560256	968132416	241190752	235057776	234025312	1598664960	1547483392	1544687872	507389824	469532768	478593088	1234733184	1253154048	1228784512	155480160	146131840	145457888	1427084928	1406249088	1493960832	140470160	142327392	147666384	1080577536	981773888	1098597888	340463136	261563456	302335552	509351584	574608512	610431424	176328016	172636176	187386816	1160744448	1115699456	1277807104	148220928	132487536
		HGTDDGIVWMNWK	179286560	180824096	184767888	54614024	37662640	51037068	134296256	143225360	147406544	25581604	24927776	23200740	266115184	265945280	276233728	59829680	55568612	41572296	214590144	216784784	185910768	12310325	10706710	11087267	262317424	247177360	245740064	12143962	9850685	10934714	192507936	178507424	189397472	31757940	18380582	22513366	92037144	102576992	111126248	29018734	10644745	21167078	272387424	205893024	227263984	15902147	14206309
		VRPFFPQQ	1487753088	1566359552	1537380608	742759296	730516160	616784192	1443194880	1456178432	1455089920	401969152	413078752	398475200	2028832000	1951284352	2039913472	574559232	533854336	541084480	1681626752	1799944576	1767144832	236744816	237760432	251216912	1876527360	1814832128	1832396928	228015584	241131344	236827168	1587543680	1490293376	1792277248	448840640	420787968	566581312	799400960	775872960	1013887232	257333888	259294976	336788768	1463748608	1473060096	1903971584	236409712	222973904
G1SIB7	3	GPHCFCPGHLTGK	17879080	18297224	19804388	19402610	20871760	22801368	19617676	18972554	19936556	16860052	18299938	16760556	21744832	24236224	25384608	11543595	12559707	12717925	14017298	16540600	16555805	6273994	6702252	8673619	8065100	10771176	9706348	6196492	7091402	7154000	24215942	18955260	22653370	16633516	15131665	22860476	15690909	12522036	16206734	7830344	7641865	8557946	11672446	11424788	15629484	6797859	5880457
		CFEPQLHR	8273703	6975543	7277137	4154371	4166788	618729	5220852	5995405	5130423	2987263	2565493	3170443	5333950	6096964	5516303	2844003	1605128	1645771	7071051	6775381	7706474	1314463	1740678	1442315	6764604	6426912	3136739	2066316	1960855	484640	7176460	6373808	7003194	2762837	2011994	4108167	8666373	6940014	7061051	2753223	1872197	2845975	6600753	7184027	7835331	2514639	2125808
		GIISWGSGCGDR	6994733	6322778	8504301	5364920	3979014	4470251	7601737	4652897	7223601	5190851	4757281	2107915	1903550	782659	2576993	2072568	953861	2234541	8005584	7331463	6694126	1308435	1360694	1225601	10531410	12173914	11131954	1452264	987498	2422136	10961396	11383297	11470387	6053646	3959923	4752695	15154991	15023694	16132123	6329750	5950170	6180529	12530607	9598181	11322752	3353144	2155804
G1U6I7	5	SCISTELFPCGK	31022402	34330520	33118046	12517779	1955390	10840069	7342984	9869194	3232088	5244950	1358696	4320742	27680136	23774788	1585697	4492676	7759488	7383727	11113998	7340168	2640613	2922114	5122002	3156890	39463500	38884680	37583408	5801245	3434366	2994777	25765180	24219520	16204318	16576888	12129754	14803519	20279152	2456786	17304428	8751996	12651258	5169687	24017778	22126716	25298076	5526328	1041838
		ETYDFDIAVLR	1239322	1745498	1556993	1243705	1992706	1682338	1196262	2049072	1973718	953186	1132607	436937	9738301	11424565	12564207	3510228	1390309	2315448	1942856	2658570	1343846	1473785	1751668	2302125	646887	1034421	1888518	261930	610078	464014	6162603	6003597	6539929	3094568	1653976	1581982	8025560	10098370	9434731	3360012	3331421	3127424	7640975	8072424	9451353	696732	371108
		NVAPACLPQK	23359960	24213046	22670614	10292012	10040909	10476895	17044966	17750092	16918594	6658449	7529802	6433642	22861220	19746132	23424962	7890753	6297114	6991760	22189086	24690446	21824072	3687711	3942222	3470979	24055280	24368690	23500296	5698927	6239993	6118055	17279320	16423669	20431860	11349839	7578561	13955376	26418820	20837990	25155538	7359091	7009515	8963026	17507462	17149592	22207598	5073148	4780130
		TGIVSGFGR	26448308	27330752	28580780	18189126	19409102	18989648	20673676	21848982	26393628	12724463	13308581	14079407	38240180	42485456	43539924	13247730	12432088	13576306	24174032	27742358	25793674	6644220	7619343	8271646	27402598	27688690	28489952	10126963	10835744	10704484	24075030	22700988	28218256	16438136	15240156	20119232	28312318	23331184	34090240	13646150	13380267	19027936	23294920	22616948	32061900	9526417	8762666
		MLEVPYVDR	20521904	20634624	22121154	10078162	12006922	11186954	17933706	18792324	11753424	10264181	10704716	9659320	31310614	31835096	33953656	8516749	7060497	9122367	25397648	24396612	26049040	4641187	5507357	5217132	28877008	28248968	21258426	4666016	5593217	6535813	10986692	16822570	18867462	6933692	5096393	6766404	20872380	20270550	24233898	9212097	8001202	9521041	19490482	17388896	18687904	5104529	5007193
[truncated: 109 more columns]
